RESEARCH ARTICLE

# KIFC1 inhibition: Exploring the potential of propolis-derived small molecules for targeting cancer progression through *in silico* analysis

Muhammad Bilal Azmi<sup>1\*</sup>, Simran Kumari<sup>1</sup>, Sakina Aquil<sup>2</sup>, Urooj Nizami<sup>2</sup>, Arisha Sohail<sup>1</sup>, Syed Danish Haseen Ahmed<sup>1</sup>, Shamim Akhtar Qureshi<sup>3</sup>

**1** Computational Biochemistry Research Laboratory, Department of Biochemistry, Dow Medical College, Dow University of Health Sciences, Karachi, Pakistan, **2** Dow Medical College, Dow University of Health Sciences, Karachi, Pakistan, **3** Department of Biochemistry, University of Karachi, Karachi, Pakistan

☞ These authors contributed equally to this work.

\* [bilal.azmi@duhs.edu.pk](mailto:bilal.azmi@duhs.edu.pk)

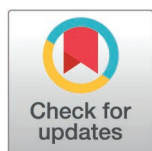

## OPEN ACCESS

**Citation:** Azmi MB, Kumari S, Aquil S, Nizami U, Sohail A, Ahmed SDH, et al. (2025) KIFC1 inhibition: Exploring the potential of propolis-derived small molecules for targeting cancer progression through *in silico* analysis. PLoS One 20(6): e0324678. <https://doi.org/10.1371/journal.pone.0324678>

**Editor:** José M. Alvarez-Suarez, Universidad San Francisco de Quito - Campus Cumbaya: Universidad San Francisco de Quito, ECUADOR

**Received:** August 15, 2024

**Accepted:** April 28, 2025

**Published:** June 5, 2025

**Copyright:** © 2025 Azmi et al. This is an open access article distributed under the terms of the [Creative Commons Attribution License](https://creativecommons.org/licenses/by/4.0/), which permits unrestricted use, distribution, and reproduction in any medium, provided the original author and source are credited.

**Data availability statement:** All relevant data are within the paper and its [Supporting Information](#) files.

**Funding:** The author(s) received no specific funding for this work.

## Abstract

Propolis, a resinous compound produced by bees, possesses diverse medicinal properties and has gained significant attention for its potential in cancer therapy. This study investigated the therapeutic significance of propolis-derived compounds targeting the kinesin-like protein KIFC1, a motor protein overexpressed in various cancers, using a multistep computational methodology. Therefore, it is essential to utilize different *in silico* methods to predict their therapeutic potential. A 3D library of propolis-derived compounds sourced from previously published literature was compiled and screened for physicochemical properties, drug-likeness, and pharmacokinetic predictions using the SwissADME and BOILED-Egg permeation predictive model. Pharmacokinetic computations were used to filter out compounds that lacked drug-likeness attributes. KIFC1 3D homology model was selected from the AlphaFold database, its stereochemical properties were assessed and validated. Virtual screening was performed to identify the high-binding affinity-based top-ranked compounds. Furthermore, the active residues present in the druggable cavities were identified using the Cavity Blind (CB) docking tool to investigate grid-box-based residue-specific molecular docking and simulation analysis. We found five common propolis-derived compounds following the druglikeness rule, and having HBA (high binding affinity) for the KIFC1 protein, were subjected to CB docking to identify druggable binding pockets (recognition of consensus residues) on KIFC1 as well as residue-specific molecular docking and simulation. Grid-box-based docking experiments for exploring the molecular interactions of the five compounds above validated the inhibitory effects of kaempferide ( $\Delta G = -7.35$  kcal/mol and  $K_i = 4.12$   $\mu$ M), luteolin ( $\Delta G = -6.74$  kcal/mol and  $K_i = 11.48$   $\mu$ M), Izalpinin ( $\Delta G = -6.33$  kcal/mol and  $K_i = 22.9$   $\mu$ M), 4',5,7-Trihydroxy-3,6-dimethoxyflavone ( $\Delta G = -6.14$  kcal/mol and  $K_i = 31.71$   $\mu$ M), and 6-methoxykaempferol ( $\Delta G = -6.55$  kcal/mol and  $K_i = 15.81$   $\mu$ M). Molecular

**Competing interests:** The authors have declared that no competing interests exist.

dynamics simulation analysis at 100 nanoseconds examined the binding modes of five screened compounds and predicted molecular interactions with KIFC1 protein residues. Two propolis-derived compounds, 4',5,7-trihydroxy-3,6-dimethoxyflavone and 6-methoxy kaempferol, showed significant interactions with KIFC1 residues and exhibited stable binding pattern. MD simulations analysis showed minor variation in root-mean-square deviation and fluctuation, confirming their equilibrium with KIFC1 protein. The study enhances understanding of propolis compounds' inhibitory effects on KIFC1 protein, providing insights for potential treatment approaches and requiring further experimental (*in vivo* and *in vitro*) as well as clinical validation.

## Introduction

The chemical substances obtained from bees, such as honey, royal jelly, and propolis, have innate characteristics that have been involved in the management of countless diseases for years[1]. Propolis is a resinous substance formed by honey bees and has been used in traditional medicine for its antibacterial, antiviral, antifungal, and antiparasitic characteristics. Notably, its antioxidant and antiproliferative properties offer its role in anticancer therapy[2–6]. Honey bees produce propolis by collecting resins, saps, and other materials from plants and combining them with beeswax and other proteins/enzymes[7]. The chemical constituents of propolis differ by plant species and are influenced by regional and environmental features[8–10]. More than 300 compounds have been identified, including aromatic acids, aliphatic compounds, flavonoids, terpenes, sugars, esters, macro as well as micronutrients, and vitamins[3,8,9]. Polyphenols as well as terpenoids are the most active compounds in propolis [10] and have been shown to modulate the cell cycle, arrest cancer cell proliferation, and inhibit angiogenesis[11]. Certain types of propolis, such as Chinese and Brazilian red propolis, have exhibited efficacy against various cancer cell lines by inhibiting the pathways linked to inflammation and cell proliferation[11–14]. Globally, the burden of cancer incidence and mortality is rapidly growing. According to a World Health Organization (WHO) report in 2019, cancer was the most important or second leading cause of death in 112 of 183 nations before the age of 70. In 2020, 19.3 million new cases were diagnosed worldwide and 10 million cancer-related deaths were reported, with 50% of the new cases and 58.3% of cancer-related deaths occurring in Asia[15]. By 2040, 28 million new cases of cancer are expected per annum if the current trends continue.

Recent studies have reported prominent KIFC1 expression in various cancers, including breast, prostate, ovarian, and non-small cell lung cancers, making it a promising target for cancer therapy owing to its redundancy in normal somatic cells[16,17]. Data indicate that KIFC1 expression correlates with higher Gleason scores, increased metastatic potential, and other markers of cancer progression, emphasizing its potential as a therapeutic target[18–21]. KIFC1 belongs to the kinesin-14 and is a C-terminal kinesin characterized by minus-end motility along microtubules[22,23]. It plays a distinctive role in mitosis, meiosis, vesicular and

organelle transport, spermiogenesis, and oocyte development[24,25]. Structurally, KIFC1 consists of three domains: a motor domain, stalk domain, and a microtubule-binding domain, similar to other motor proteins[26]. The motor contains the ATP hydrolysis site and microtubule interaction region, generating the energy required for spindle elongation, stability, and organization[27,28]. A fundamental function of KIFC1 is its role in mitotic spindle assembly and chromosomal stability, which are critical for cell division and cell survival. During mitosis, proper spindle formation ensures accurate chromosomal segregation, thereby preventing aneuploidy and genomic instability. In cancer cells with supernumerary centrosomes, KIFC1 prevents multipolar mitotic spindle formation, which otherwise leads to mitotic catastrophe and cell death [25,29]. This is achieved by crosslinking and sliding microtubules, facilitating centrosome clustering, and stabilizing bipolar spindle formation [25,30]. Additionally, KIFC1 interacts with key mitotic regulators, such as cyclins (Cyclin B1, Cyclin D, and Cyclin A), spindle assembly checkpoint proteins (MAD1-MAD2), and Aurora B kinase, ensuring successful mitotic progression and promoting uncontrolled proliferation in cancer cells [25,30–32]. The ability of KIFC1 to rescue chromosomal instability in highly proliferative tumor cells further supports its relevance as a cancer therapeutic target [23,25,30,33]. Several small-molecule inhibitors that interact with KIFC1 and disrupt its function have been identified, effectively reversing the centrosome clustering phenotype in cancer cells [34,35]. However, obtaining structural data to precisely map the binding sites of KIFC1 inhibitors remains a challenge. Further research is required to refine these inhibitors and improve their specificity and drug-like properties to enhance their therapeutic potential.

Virtual screening and molecular dynamics simulations have identified a few promising small-molecule inhibitors with strong binding interactions with KIFC1[36]. The KIFC1 inhibitors structure and binding data across various small-molecule inhibitors remain limited. Therefore, this study used a comprehensive docking analysis of propolis-derived small molecules or compounds to computationally target the inhibitory activity of KIFC1 protein expression. This computational analysis revealed the binding affinities of propolis-derived compounds at three possible binding sites in the motor domain. Docking analysis was also helpful for identifying potential KIFC1 inhibitors and contributing to the drug design process for KIFC1 inhibitors. Therefore, this study may be fundamental for the development of novel anticancer compounds from propolis-derived small molecules with increased potency, improved pharmacological profiles, and low toxicity.

## Methodology

**Fig 1** shows the step-wise scheme of the present work methodology.

### Retrieval of the gene and protein sequence of KIFC1

The gene for the kinesin-like protein (*KIFC1*) encodes a minus end-directed motor protein was retrieved from the UniProt database (<https://www.uniprot.org/>)[37,38]. The authenticity of the gene sequence was confirmed based on annotation status, information gathered from literature and curator-reviewed computational analysis [38]. Gene identifiers and NCBI accession numbers were cross-referenced to validate the obtained gene information (<https://www.ncbi.nlm.nih.gov/gene/3833>) [39].

The FASTA format of selected gene was obtained from the NCBI database and the Basic Local Alignment Search Tool (BLAST) (<https://blast.ncbi.nlm.nih.gov/Blast.cgi>) compared the human protein sequence (query sequence) against target sequences in the database by selecting research collaboratory for structural bioinformatics (RCSB) protein data bank (PDB) (<https://www.rcsb.org/search/advanced/sequence>) as a set parameter to conduct a protein BLAST search of the relevant collection[40,41].

### 3D homology model of the KIFC1 protein and structural validation

The AlphaFold Protein Structure Database, which is accessible via UniProt database (<https://alphafold.ebi.ac.uk>), was employed to select the optimal 3D protein homology model for comprehensive structural coverage of amino

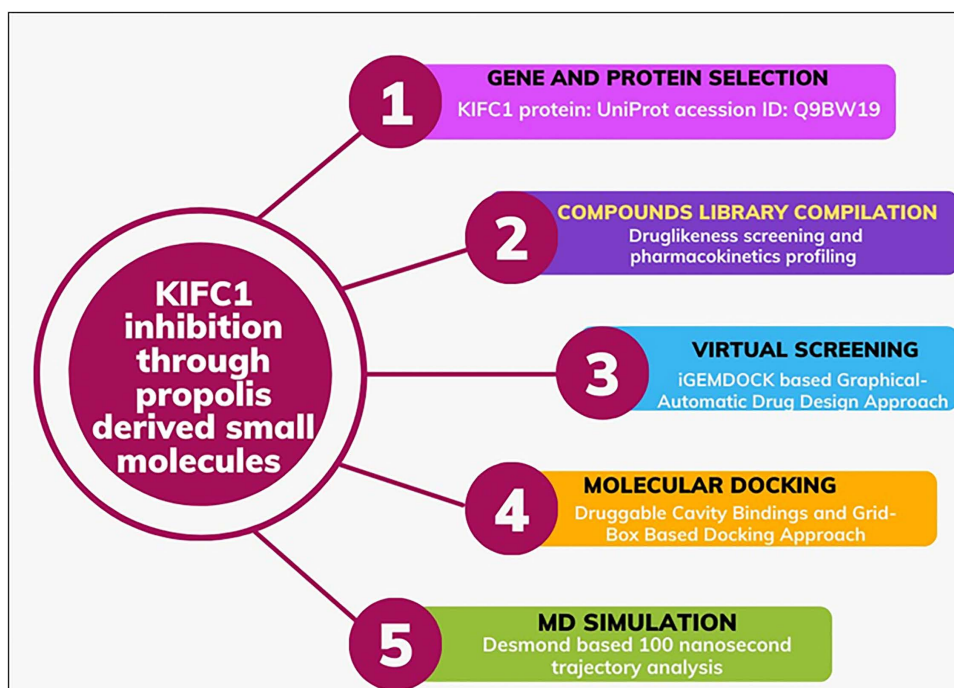

**Fig 1. Stepwise schematic workflow of the present study.**

<https://doi.org/10.1371/journal.pone.0324678.g001>

acid residues in the canonical protein-coding sequence (canonical) of the KIFC1 gene [42,43]. The purpose of employing this strategy was due to the unavailability of complete 3D protein model in PDB. If the sequence query coverage was not complete, a 3D model of target protein with complete coverage (amino acid length 673) from the canonical sequence was chosen as the preferable option. AlphaFold is recognized as the leading protein structure prediction method in the Critical Assessment of Techniques for Protein Structure Prediction (CASP14) by a significant margin, generating highly accurate predictions. This database is an artificial intelligence (AI)-based system established by Google DeepMind and EMBL's European Bioinformatics Institute (EMBL-EBI), which uses the amino acid sequence of protein to predict the 3D structure. This tool regularly achieves accuracy competitive with experiments [44].

After selecting 3D protein model, UCSF Chimera <https://www.cgl.ucsf.edu/chimera/> was used to investigate the molecular characteristics and visualize the resulting protein structure [45] while the energy of KIFC1 PDB structure was minimized through Swiss PDB Viewer tool (<https://spdbv.unil.ch/>) [46]. The model built was validated through PROCHECK <https://www.ebi.ac.uk/thornton-srv/software/PROCHECK/> using an ERRAT quality factor, Ramachandran plot, Prosa-web (<https://prosa.services.came.sbg.ac.at/prosa.php>), and the residual properties of the constructed model [47]. The dihedral angles  $\phi$  against  $\psi$  of the possible conformations of amino acids in the protein structure were also studied in the Ramachandran plot [48,49]. The structure validation server – SAVES (<https://saves.mbi.ucla.edu/>) was used to determine the probable structural errors and z scores of the selected 3D protein model.

### Propolis derivatives: three-dimensional compound library compilation

The propolis-derived small molecules were sourced from previously published literature and their three-dimensional configurations were acquired from the PubChem database (<https://pubchem.ncbi.nlm.nih.gov>) [50] in the Structure Data Format (SDF) format. The SDF-2D format of all compounds were converted into PDB-3D format using Open Babel software

<https://openbabel.org/index.html> and visualized using the BIOVIA Discovery Studio Visualizer (<https://www.3ds.com/products/biovia/discovery-studio>)[51].

### Assessment of propolis derivatives: physicochemical properties, pharmacokinetics and drug likeness

The propolis derivatives were analyzed to predict their pharmaceutically important descriptors (ADME) and physiochemical attributes. The physicochemical properties of compounds include molecular weight (MW), number of heavy atoms (HA), number of aromatic heavy atoms (ARO HA), fraction of carbons in the  $sp^3$  hybridization (FC $sp^3$ ), rotatable bond (RB), hydrogen bond acceptor (HBA), hydrogen bond donor (HBD), molar refractivity (MR), topological polar surface area (TPSA), pharmacokinetics properties including GI absorption, BBB permeation, P-gp substrate status, cytochrome-P enzyme inhibition, and skin permeation (log K $p$ ), for predicting drug absorption and distribution within the body as well as drug likeness (based on Lipinski's rule of five), were predicted using SwissADME (<http://www.swissadme.ch/>) [52]. The physiochemical properties such as lipophilicity (logP), skin permeation and bioavailability score for drug-likeness were presented numerically, while the remaining pharmacokinetic and drug-likeness parameters were shown categorically. The solubility parameters of propolis derivatives such as, logP and logS values were predicted using pkCSM (<https://biosig.lab.uq.edu.au/pkcsml/>) [53]. A boiled egg prediction model was constructed using the topological surface area (TPSA) and the lipophilicity (logP) of propolis compounds to analyse gastrointestinal tract absorption and blood-brain barrier penetration [52].

### Integrated virtual screening of propolis-derived small compounds: exploring druggable binding pockets with a residue-specific grid-box-based molecular docking approach

The KIFC1 protein structure used in this study was obtained from the AlphaFold protein structure database [42–44]. However, detailed characterization of the active site residues and binding pockets is not readily available because of the inherent limitations of the predicted 3D structural model and the absence of a fully resolved structure in the PDB repository. Given this constraint, we employed a blind docking approach, a widely accepted computational strategy in drug discovery, particularly when the exact binding site is unknown or not well-defined [54–56]. This method allows for unbiased identification of potential binding sites and facilitates the screening of promising inhibitors for further experimental validation [55]. Moreover, our primary objective in utilizing this strategy was to enhance the efficiency of propolis-derived small molecule screening by rapidly identifying potential candidates (by narrowing the pool of compounds) for subsequent validation studies.

Virtual screening of propolis-derived small molecules were conducted through iGEMDOCK (<http://gemdock.life.nctu.edu.tw/dock/igemdock.php>) to narrow the number of candidate compounds for further computational validation [54]. Blind docking approach was used in this virtual screening because the active site information of a target protein is not available. This method of computational analysis aids in the identification of potential binding regions on protein and candidate compounds. The identified top-ranked compounds were subjected to hit identification testing using the iGEMDOCK graphic automatic drug design system to determine the ligand-protein associations based on the fitness values. iGEMDOCK is a graphical-integration platform for virtual screening that employs k-means and hierarchical clustering techniques for analyzing compound characteristics and protein-ligand interactions. It provides novel post analysis tools, such as atomic composition (AC), which assesses compound similarity by comparing it to the amino acid present in a protein sequence [54].

Among the forty screened compounds, the five with the highest binding energies were selected for further optimizations using cavity detection-guided blind docking <https://cadd.labshare.cn/cb-dock2/> approach [55,56]. The cavity binding docking (CB dock) method generated consensus interaction cavities within the 3D model of KIFC1 protein after docking it with the selected top-ranked screened drug-like compounds of propolis. An automated protein-ligand docking approach was used to conduct CB-guided blind docking to examine binding cavities and sites within the homology model. CB Dock



utilizes “CurPocket” approach to compare and rank cavities. This method applies protein–ligand binding site prediction techniques, using the COACH benchmark set as reference [57]. This utilizes a novel method of cavity detection based on their curvature. Moreover, it determines the center and dimensions of the docking box of a potential cavity as a crucial parameter of the process. This approach was meticulously optimized, achieving a success rate of 70% in the top-ranking poses, with a root mean square deviation (RMSD) within 2 Å from the X-ray pose for a test set of structures, not specifically for the presently investigated protein [56].

We further scrutinized the cavities with the highest grades reflecting the consensus residues generated after interaction of each propolis compound with the KIFC1 protein model for molecular visualization and interpretation of the therapeutic intervention using a 2D ligand plot. The consensus-interacting residues identified through CB Dock were documented and utilized for grid-box-based AutoDock Vina (version 4.2) <https://autodock.scripps.edu/download-autodock4/> analysis of protein–propolis interactions [58,59]. The polar hydrogen was incorporated, and partial charges were assigned to the standard residue using the Gasteiger partial charge method, which assumes that all hydrogen atoms are explicitly represented. The most favorable binding interactions were estimated based on the lowest predicted binding free energy obtained from the best molecular docking simulation pose [59]. The inhibition constant ( $K_i$ ) was derived from the binding energy ( $\Delta G$ ) using the formula  $K_i = \exp(\Delta G/RT)$ , where  $R$  is the universal gas constant ( $1.985 \times 10^{-3}$  kcal mol<sup>-1</sup> K<sup>-1</sup>) and  $T$  is the temperature (298.15 K) [60].

### Molecular dynamics simulation

The MD simulations were performed using the Desmond simulation package to further optimize the top five propolis compounds as a promising lead compound [61–63] in the physiological environment. The system was constructed using the TIP3P (Intermolecular Interaction Potential 3 Points Transferable) tool and the ligands and the protein were prepared using an orthorhombic box with the OPLS\_2005 force field as the solvent model [64,65]. The simulation was performed at 300 K (temperature) and 1 atm (pressure), and the model was neutralized by adding 0.15 M sodium chloride. The protein–ligand complex trajectories were saved every 100 picoseconds (ps) and visualized using the simulation interaction diagram tool in the Desmond package (Schrödinger Release 2021–2: Desmond Molecular Dynamics System DESR. New York). The stability dynamics of the protein–ligand complex were determined by measuring the root mean square deviation (RMSD) and root mean square fluctuation (RMSF) over 100 ns [66]. In molecular modeling and structural analysis, RMSD is a measure of the average atom displacement between two superimposed molecular structures, to evaluate conformational differences [63,66]. Principal Component Analysis (PCA) was utilized to examine large-scale conformational dynamics in molecular dynamics (MD) simulations by reducing the dimensionality of atomic displacement data and extracting dominant motion patterns [67,68]. This statistical approach effectively differentiates functionally significant biomolecular motions from random fluctuations, providing a comprehensive visualization of the conformational landscape. By identifying key structural transitions, PCA facilitates comparative assessments between molecular states, offering insights into protein flexibility, allosteric modulation, and ligand-induced conformational changes. The analysis was conducted using the Bio3D package in R [69], where a dedicated script written in R was used to compute the principal components and evaluate the essential motions of the system [67,68].

### MM-GBSA calculations

The Molecular Mechanics Generalized Born Surface Area (MM-GBSA) Gibbs free energy change ( $\Delta G_{\text{bind}}$ ) calculations, along with molecular docking and MD simulations, were collectively employed to identify the most stable KIFC1 inhibitors (propolis-derived small molecules). This approach addressed the limitations of overestimated binding affinities in docking studies and the lack of quantitative scoring in MD simulations [70]. The MM-GBSA method was utilized to compute the binding free energy ( $\Delta G_{\text{bind}}$ ). The ‘MM-GBSA’ module in Maestro 12.3 was used for these calculation, employing the

OPLS-2005 force field and the VSGB 2.0 energy model as the solvent model. All other settings were applied using default parameters. The resulting binding free energies were measured in kcal/mol. The MM-GBSA binding free energies were determined using the following formula:

$$\Delta G_{\text{bind}} = G_{\text{complex}} - G_{\text{receptor}} - G_{\text{ligand}}$$

Including all interactions between the ligand and protein, the free energy of the protein-ligand complex is represented by the term  $G_{\text{complex}}$ . It considers the contributions of bonded (covalent) and nonbonded interactions, including solvation effects, hydrogen bonding, van der Waals forces, and electrostatic interactions.  $G_{\text{receptor}}$  is the free energy of an unbound protein receptor that has been isolated. This signifies the energy linked to the structure of the protein and the interactions that occur within the protein, instead of with the ligand. The unbound free energy of the isolated ligand is known as the  $G_{\text{ligand}}$ , which refers to the ligand structure and its internal interactions, excluding those with the protein.

## Results

### *KIFC1* gene, protein selection and its 3D structure-template search

The details of the *KIFC1* gene and protein were obtained from NCBI and UniProt using gene ID 3833 and accession number Q9BW19. The reference sequence NC\_000006.12 was utilized to select an appropriate protein for molecular docking. The *KIFC1* gene has four transcripts with a total of 2694 base pairs, situated at 6p21.32 with 13 exons. Notably, the gene results were similar to HSET and KNSL2 genes. The molecular weight of *KIFC1* protein is 73,748 Da and is made of 673 amino acids with Leucine being the most abundant amino acid. The protein has net positive charge and half-life in mammalian reticulocytes is 30 hours.

The BLAST results of the selected *KIFC1* protein sequence identified several sequences that matched the 3D structures in the PDB database ([S1 Table](#)). The crystal structure of PDB ID 5WDH\_A was the best match with maximum score of 731, a sequence length of 376 residues, 53% query coverage, and 99.72% identity. However, the preference was given to selecting a PDB model that provided full coverage and complete residue similarity with the chosen protein sequence. Therefore, the AlphaFold database was preferred to obtain a protein sequence specific, complete 3D model. Currently, this database is preferred to generate a 3D structure with complete identical sequence information for the protein target. Subsequently, the structural identifier 'AF-Q9BW19-F1' of the desired protein encoded by the *KIFC1* gene was used to obtain its 3D model from the AlphaFold database. Before further use, the structure was meticulously cleaned to remove any heteroatoms, ions, or other bound molecules. This preparation was essential to enhance the interactions and generalizability of the ensuing outcomes.

### *KIFC1* 3D structure validation and refinement

The 3D structure of *KIFC1* protein retrieved from AlphaFold database was downloaded in the PDB format and assessed for its stereochemical quality and structural accuracy. The PROCHECK analysis revealed in the Ramachandran plot that 91.4% of the residues were in the core region, 6.7% were in the allowed zone (yellow color), and 1.2% were in the generously allowed zone (red color). The ERRAT quality factor was 92.5%. The bond/length angle was 10.2, with the highest deviation being 18. There was no reported bad contact score according to the 3D structural residue attributes ([S1 Fig.](#)). The 3D structural G-factor analysis by SAVES showed a total value of -0.01, a dihedral value of -0.12, and a covalent value of 0.15. In addition, the planar group analysis revealed that 6.3% of the residues were highlighted and 93.7% of the residues were within limits. The energy of the *KIFC1* protein structure was further refined by minimizing it to -37642.84 kJ/mol. This process resulted in 937.473 bonds, 3229.849 angles, and 4133.502 torsion events. Additionally, the electrostatic energy was -28286.47. The energy minimization of the homology model increased the overall quality factor to 94.80%.

## ***In silico* prediction of potential pharmacokinetic and drug-like properties of propolis compounds**

The canonical SMILES and structures of propolis compounds were deposited in PDB format in the library for physiochemical screening ([S2 Table](#)). The molecular weight, number of heavy and aromatic heavy atoms, fraction of carbons in the sp<sup>3</sup> hybridization, rotatable bonds, hydrogen bond acceptor and bond donor, molar refractivity and topological polar surface area of compounds were screened and compounds with PUBCHEM IDs 44257510, 5472440, 637125, 336327, 92503, 72307, and 6549 were identified within the desirable range out of forty compounds ([Table 1](#)). The lipophilicity parameters such as XLogP3, WLogP and MLogP of thirty propolis compounds were within the desirable limits showing balance of hydrophilicity and lipophilicity suggesting that the compounds likely have favorable ADMET properties ([Table 2](#)). The solubility (Log S) parameters such as Estimated Solubility (ESOL), solubility methods developed by Ali and SILICOS-IT [Log S (Ali) and Log S (SILICOS-IT)] were used to quantify water solubility of propolis compounds and classified them into insoluble, poorly, moderately, soluble, very or highly water soluble. Nine propolis compounds were predicted to likely have desirable water solubility by all three solubility parameters suggesting good absorption, bioavailability, and overall efficacy as drug candidates ([Table 3](#)). The skin permeability, Kp, values predicted for all the propolis compounds were in the range of −1.9 to −6.9 cm/s indicating low skin permeability ([Table 4](#)). This study found that eleven out of forty propolis compounds can act as drug transporters for P-glycoprotein substrate ([Table 4](#)) which could potentially result in drug-drug interactions, accumulation of drugs or their by-products and toxic or other undesired effects due to reduced clearance. The inhibition of CYP enzymes is a common factor in drug interactions. However, CYP3A4 inhibitors have the potential to enhance the effectiveness of specific chemotherapy drugs by increasing their plasma concentrations and bioavailability. As indicated in [Table 4](#), all propolis compounds exhibited CYP3A4 inhibitory effects except for 11 compounds. Thirteen out of the forty propolis compounds violated Lipinski's rule of five for molecular weight. Overall, twenty-two compounds adhered to all five drug-likeness criteria, with a bioavailability score exceeding 0.55, signifying their drug-like molecular nature ([Table 5](#)). In [Fig 2](#), the prediction of intestinal absorption and blood-brain barrier penetration is given in the form of BOILED egg model. The yolk (yellow part) represents the compounds most likely to penetrate the BBB and the white region shows a greater propensity for HIA penetration while P-gp-positive and P-gp-negative molecules are denoted by blue and red dots. Of the forty compounds, eighteen compounds resided in the blood-brain barrier penetration area and thirty-one compounds were located in intestinal absorption area [Fig 2](#). Eleven propolis compounds found to be P-gp positive (blue dots) were eliminated from the brain penetration region which excluded them from further optimization. The drug-likeness criteria (CFDLR) and higher binding affinity with the KIFC1 protein (HBA) led to select five promising compounds out of forty: 6-methoxy kaempferol, 4',5,7-Trihydroxy-3,6-dimethoxyflavone, Izalpinin, Kaempferide, and luteolin ([Fig 3](#)). Only Izalpinin was predicted to penetrate the blood-brain barrier and be absorbed in the gastrointestinal tract due to its lower TPSA value. All five compounds showed similar bioavailability score (0.55) and were CYP1A2, CYP2D6 and CYP3A4 inhibitors in addition to 4',5,7-Trihydroxy-3,6-dimethoxyflavone that acted as CYP2C9 inhibitor enzyme suggesting as suitable drug candidate for KIFC1 inhibition ([Table 4](#)).

## **iGEMDOCK-based virtual screening of propolis-derived compounds and identification of druggable cavities in the KIFC1 protein: Insights into key molecular interactions via the cavity-binding docking approach**

All the propolis compounds examined in this study exhibited significant binding affinities and interactions with the KIFC1 protein ([S3 Table](#)). The top ten compounds were selected based on their lowest binding affinity scores. These top ten compounds were then further analyzed from a pool of twenty-two compounds that met all five drug-likeness rules and had a bioavailability score of 0.55. Out of these, the five propolis compounds with the highest binding affinities to KIFC1, namely Luteolin (−92.6849 kcal/mol), Kaempferide (−92.4845 kcal/mol), Izalpinin (−98.6709 kcal/mol), 4',5,7-Trihydroxy-3,6-dimethoxyflavone (−91.5905 kcal/mol), and 6-Methoxykaempferol (−91.6742 kcal/mol) met all the drug-likeness criteria and had a bioavailability score of 0.55, were chosen for docking studies ([Fig 3](#)).



**Table 1. The compounds' identifiers and physicochemical properties of propolis compounds.**

| S. No. | PubChem ID | MW (g/mol) | HA | ARO HA | FCsp3 | RB | HBA | HBD | MR     | TPSA (Å <sup>2</sup> ) |
|--------|------------|------------|----|--------|-------|----|-----|-----|--------|------------------------|
| 1      | 44257510   | 272.3      | 20 | 12     | 0.25  | 2  | 4   | 2   | 75.62  | 58.92                  |
| 2      | 21721815   | 324.37     | 24 | 12     | 0.25  | 4  | 4   | 1   | 92.77  | 55.76                  |
| 3      | 11455669   | 552.7      | 40 | 6      | 0.61  | 7  | 7   | 3   | 153.79 | 121.13                 |
| 4      | 11272353   | 518.68     | 38 | 6      | 0.55  | 7  | 5   | 1   | 150.95 | 80.67                  |
| 5      | 11114020   | 518.68     | 38 | 6      | 0.55  | 7  | 5   | 1   | 150.95 | 80.67                  |
| 6      | 10907594   | 534.68     | 39 | 6      | 0.48  | 7  | 6   | 3   | 156.5  | 111.9                  |
| 7      | 10791588   | 502.68     | 37 | 6      | 0.55  | 6  | 4   | 0   | 149.79 | 60.44                  |
| 8      | 9984117    | 518.68     | 38 | 6      | 0.55  | 7  | 5   | 1   | 150.95 | 80.67                  |
| 9      | 5472440    | 300.39     | 22 | 6      | 0.32  | 6  | 3   | 2   | 92.57  | 57.53                  |
| 10     | 5471610    | 502.68     | 37 | 6      | 0.48  | 7  | 4   | 1   | 152.45 | 71.44                  |
| 11     | 5377945    | 316.26     | 23 | 16     | 0.06  | 2  | 7   | 4   | 82.5   | 120.36                 |
| 12     | 5352032    | 330.29     | 24 | 16     | 0.12  | 3  | 7   | 3   | 86.97  | 109.36                 |
| 13     | 5318691    | 284.26     | 21 | 16     | 0.06  | 2  | 5   | 2   | 78.46  | 79.9                   |
| 14     | 5281954    | 268.26     | 20 | 16     | 0.06  | 2  | 4   | 1   | 76.44  | 59.67                  |
| 15     | 5281787    | 284.31     | 21 | 12     | 0.12  | 6  | 4   | 2   | 80.77  | 66.76                  |
| 16     | 5281666    | 300.26     | 22 | 16     | 0.06  | 2  | 6   | 3   | 80.48  | 100.13                 |
| 17     | 5281628    | 300.26     | 22 | 16     | 0.06  | 2  | 6   | 3   | 80.48  | 100.13                 |
| 18     | 5281616    | 270.24     | 20 | 16     | 0     | 1  | 5   | 3   | 73.99  | 90.9                   |
| 19     | 5280681    | 316.26     | 23 | 16     | 0.06  | 2  | 7   | 4   | 82.5   | 120.36                 |
| 20     | 5280445    | 286.24     | 21 | 16     | 0     | 1  | 6   | 4   | 76.01  | 111.13                 |
| 21     | 5280442    | 284.26     | 21 | 16     | 0.06  | 2  | 5   | 2   | 78.46  | 79.9                   |
| 22     | 5280373    | 284.26     | 21 | 16     | 0.06  | 2  | 5   | 2   | 78.46  | 79.9                   |
| 23     | 5280343    | 302.24     | 22 | 16     | 0     | 1  | 7   | 5   | 78.03  | 131.36                 |
| 24     | 3938139    | 244.24     | 18 | 12     | 0.07  | 3  | 4   | 2   | 66.85  | 66.76                  |
| 25     | 3873459    | 246.26     | 18 | 10     | 0.21  | 3  | 4   | 1   | 69.75  | 59.67                  |
| 26     | 689043     | 180.16     | 13 | 6      | 0     | 2  | 4   | 3   | 47.16  | 77.76                  |
| 27     | 638278     | 256.25     | 19 | 12     | 0     | 3  | 4   | 3   | 72.32  | 77.76                  |
| 28     | 637542     | 164.16     | 12 | 16     | 0     | 2  | 3   | 2   | 45.13  | 57.53                  |
| 29     | 637541     | 164.16     | 12 | 6      | 0     | 2  | 3   | 2   | 45.13  | 57.53                  |
| 30     | 637540     | 164.16     | 12 | 6      | 0     | 2  | 3   | 2   | 45.13  | 57.53                  |
| 31     | 637125     | 302.45     | 22 | 0      | 0.65  | 4  | 2   | 1   | 93.86  | 37.3                   |
| 32     | 637105     | 502.68     | 37 | 6      | 0.48  | 8  | 4   | 1   | 151.88 | 71.44                  |
| 33     | 444539     | 148.16     | 11 | 6      | 0     | 2  | 2   | 1   | 43.11  | 37.3                   |
| 34     | 336327     | 270.28     | 20 | 12     | 0.25  | 1  | 4   | 1   | 73.17  | 47.92                  |
| 35     | 259846     | 426.72     | 31 | 0      | 0.93  | 1  | 1   | 1   | 135.14 | 20.23                  |
| 36     | 238782     | 256.25     | 19 | 12     | 0.13  | 1  | 4   | 2   | 69.55  | 66.76                  |
| 37     | 92503      | 272.3      | 20 | 12     | 0.25  | 2  | 4   | 2   | 75.62  | 58.92                  |
| 38     | 72307      | 354.35     | 26 | 12     | 0.4   | 2  | 6   | 0   | 90     | 55.38                  |
| 39     | 6549       | 154.25     | 11 | 0      | 0.6   | 4  | 1   | 1   | 50.44  | 20.23                  |
| 40     | 370        | 170.12     | 12 | 6      | 0     | 1  | 5   | 4   | 39.47  | 97.99                  |

**Abbreviations with reference range:** MW: molecular weight ( $\leq 500 \text{ gm}^{-1}$ ), HA: number of heavy atoms, ARO HA: number of aromatic heavy atoms, FCsp<sup>3</sup>: fraction of carbons in the sp<sup>3</sup> hybridization ( $\geq 0.25$ ), RB: rotatable bond ( $\leq 10$ ), HBA: hydrogen bond acceptor ( $\leq 10$ ), HBD: hydrogen bond donor ( $\leq 5$ ), MR: molar refractivity ( $\leq 130$ ), TPSA: topological polar surface area ( $\leq 150$ ).

<https://doi.org/10.1371/journal.pone.0324678.t001>

**Table 2. The LogP values for lipophilicity of propolis compounds predicted using different computation methods.**

| S. No. | PubChem ID | Log Po/w (iLOGP) | Log Po/w (XLOGP3) | Log Po/w (WLOGP) | Log Po/w (MLOGP) | Log Po/w (SILICOS-IT) | Consensus Log Po/w |
|--------|------------|------------------|-------------------|------------------|------------------|-----------------------|--------------------|
| 1      | 44257510   | 2.26             | 2.94              | 2.83             | 1.87             | 2.89                  | 2.56               |
| 2      | 21721815   | 3.58             | 4.7               | 4.7              | 2.38             | 4.24                  | 3.81               |
| 3      | 11455669   | 4.08             | 4.42              | 4.73             | 1.77             | 6.05                  | 4.21               |
| 4      | 11272353   | 4.68             | 6.71              | 6.57             | 3.3              | 7.43                  | 5.74               |
| 5      | 11114020   | 4.38             | 6.77              | 6.57             | 3.3              | 7.43                  | 5.69               |
| 6      | 10907594   | 4                | 8.41              | 7.18             | 2.95             | 7.36                  | 5.98               |
| 7      | 10791588   | 4.58             | 7.69              | 7.6              | 4.13             | 8.29                  | 6.46               |
| 8      | 9984117    | 4.6              | 6.71              | 6.57             | 3.3              | 7.43                  | 5.72               |
| 9      | 5472440    | 3.06             | 5.37              | 4.4              | 3.75             | 4.76                  | 4.27               |
| 10     | 5471610    | 4.16             | 9.12              | 7.76             | 4.06             | 8.28                  | 6.68               |
| 11     | 5377945    | 2.1              | 1.87              | 2.29             | -0.31            | 2.06                  | 1.6                |
| 12     | 5352032    | 2.56             | 2.82              | 2.59             | -0.07            | 2.59                  | 2.1                |
| 13     | 5318691    | 2.68             | 2.58              | 2.88             | 0.77             | 3.03                  | 2.39               |
| 14     | 5281954    | 2.88             | 3.85              | 3.17             | 1.33             | 3.52                  | 2.95               |
| 15     | 5281787    | 2.66             | 4.15              | 2.79             | 2.62             | 3.26                  | 3.09               |
| 16     | 5281666    | 2.43             | 2.22              | 2.59             | 0.22             | 2.55                  | 2                  |
| 17     | 5281628    | 2.27             | 2.99              | 2.59             | 0.22             | 2.55                  | 2.12               |
| 18     | 5281616    | 2.08             | 2.25              | 2.58             | 0.52             | 2.52                  | 1.99               |
| 19     | 5280681    | 2                | 2.71              | 2.29             | -0.31            | 2.06                  | 1.75               |
| 20     | 5280445    | 1.86             | 2.53              | 2.28             | -0.03            | 2.03                  | 1.73               |
| 21     | 5280442    | 2.56             | 3.35              | 2.88             | 0.77             | 3.03                  | 2.52               |
| 22     | 5280373    | 2.55             | 2.99              | 2.88             | 0.77             | 3.03                  | 2.44               |
| 23     | 5280343    | 1.63             | 1.54              | 1.99             | -0.56            | 1.54                  | 1.23               |
| 24     | 3938139    | 2.12             | 3.43              | 2.34             | 1.41             | 2.43                  | 2.34               |
| 25     | 3873459    | 2.79             | 3.02              | 2.84             | 1.79             | 3.04                  | 2.7                |
| 26     | 689043     | 0.97             | 1.15              | 1.09             | 0.7              | 0.75                  | 0.93               |
| 27     | 638278     | 2.02             | 3.18              | 2.59             | 1.58             | 2.48                  | 2.37               |
| 28     | 637542     | 0.95             | 1.46              | 1.38             | 1.28             | 1.22                  | 1.26               |
| 29     | 637541     | 1.14             | 1.79              | 1.38             | 1.28             | 1.22                  | 1.36               |
| 30     | 637540     | 1.09             | 2.03              | 1.38             | 1.28             | 1.22                  | 1.4                |
| 31     | 637125     | 3.14             | 5.71              | 5.37             | 4.45             | 4.94                  | 4.72               |
| 32     | 637105     | 4.87             | 8.28              | 7.92             | 4.06             | 8.28                  | 6.68               |
| 33     | 444539     | 1.55             | 2.13              | 1.68             | 1.9              | 1.7                   | 1.79               |
| 34     | 336327     | 2.53             | 2.77              | 2.69             | 1.87             | 1.87                  | 2.52               |
| 35     | 259846     | 4.68             | 9.87              | 8.02             | 6.92             | 6.82                  | 7.26               |
| 36     | 238782     | 2.11             | 2.88              | 2.48             | 1.27             | 2.55                  | 2.26               |
| 37     | 92503      | 2.26             | 2.94              | 2.83             | 1.87             | 2.89                  | 2.56               |
| 38     | 72307      | 3.46             | 2.68              | 2.57             | 1.98             | 3.25                  | 2.79               |
| 39     | 6549       | 2.7              | 2.97              | 2.67             | 2.59             | 2.35                  | 2.66               |
| 40     | 370        | 0.21             | 0.7               | 0.5              | -0.16            | -0.2                  | 0.21               |

The reference ranges: XLogP3: (-2–5), WLogP: (-0.4 to 5.88), and MLogP: ( $\leq 4.15$ ).

<https://doi.org/10.1371/journal.pone.0324678.t002>

**Table 3. The LogS values for solubility of propolis compounds predicted using different computation methods<sup>1</sup>.**

| S. No. | PubChem ID | Log S (ESOL) | Class              | Log S (Ali) | Class              | Log S (SILICOS-IT) | Class              |
|--------|------------|--------------|--------------------|-------------|--------------------|--------------------|--------------------|
| 1      | 44257510   | -3.69        | Soluble            | -3.84       | Soluble            | -3.69              | Moderately soluble |
| 2      | 21721815   | -4.92        | Moderately soluble | -5.6        | Moderately soluble | -5.55              | Moderately soluble |
| 3      | 11455669   | -5.7         | Moderately soluble | -6.68       | Poorly soluble     | -6.78              | Poorly soluble     |
| 4      | 11272353   | -6.94        | Poorly soluble     | -8.21       | Poorly soluble     | -7.75              | Poorly soluble     |
| 5      | 11114020   | -6.98        | Poorly soluble     | -8.27       | Poorly soluble     | -7.75              | Poorly soluble     |
| 6      | 10907594   | -8.11        | Poorly soluble     | -10.63      | Insoluble          | -6.96              | Poorly soluble     |
| 7      | 10791588   | -7.53        | Poorly soluble     | -8.8        | Poorly soluble     | -8.79              | Poorly soluble     |
| 8      | 9984117    | -6.94        | Poorly soluble     | -8.21       | Poorly soluble     | -7.75              | Poorly soluble     |
| 9      | 5472440    | -4.89        | Moderately soluble | -6.33       | Poorly soluble     | -3.81              | Soluble            |
| 10     | 5471610    | -8.36        | Poorly soluble     | -10.52      | Insoluble          | -8.15              | Poorly soluble     |
| 11     | 5377945    | -3.36        | Soluble            | -4.02       | Moderately soluble | -3.94              | Soluble            |
| 12     | 5352032    | -3.96        | Soluble            | -4.77       | Moderately soluble | -4.63              | Moderately soluble |
| 13     | 5318691    | -3.66        | Soluble            | -3.91       | Soluble            | -5.1               | Moderately soluble |
| 14     | 5281954    | -4.39        | Moderately soluble | -4.8        | Moderately soluble | -5.68              | Moderately soluble |
| 15     | 5281787    | -4.24        | Moderately soluble | -5.26       | Moderately soluble | -4.35              | Moderately soluble |
| 16     | 5281666    | -3.51        | Soluble            | -3.96       | Soluble            | -4.52              | Moderately soluble |
| 17     | 5281628    | -3.99        | Soluble            | -4.76       | Moderately soluble | -4.52              | Moderately soluble |
| 18     | 5281616    | -3.46        | Soluble            | -3.79       | Soluble            | -4.4               | Moderately soluble |
| 19     | 5280681    | -3.89        | Soluble            | -4.89       | Moderately soluble | -3.94              | Soluble            |
| 20     | 5280445    | -3.71        | Soluble            | -4.51       | Moderately soluble | -3.82              | Soluble            |
| 21     | 5280442    | -4.14        | Moderately soluble | -4.71       | Moderately soluble | -5.1               | Moderately soluble |
| 22     | 5280373    | -3.92        | Soluble            | -4.33       | Moderately soluble | -5.1               | Moderately soluble |
| 23     | 5280343    | -3.16        | Soluble            | -3.91       | Soluble            | -3.24              | Soluble            |
| 24     | 3938139    | -3.81        | Soluble            | -4.51       | Moderately soluble | -3.85              | Soluble            |
| 25     | 3873459    | -3.48        | Soluble            | -3.94       | Soluble            | -4.05              | Moderately soluble |
| 26     | 689043     | -1.89        | Very soluble       | -2.38       | Soluble            | -0.71              | Soluble            |
| 27     | 638278     | -3.7         | Soluble            | -4.48       | Moderately soluble | -3.23              | Soluble            |
| 28     | 637542     | -2.02        | Soluble            | -2.27       | Soluble            | -1.28              | Soluble            |
| 29     | 637541     | -2.22        | Soluble            | -2.62       | Soluble            | -1.28              | Soluble            |
| 30     | 637540     | -2.37        | Soluble            | -2.87       | Soluble            | -1.28              | Soluble            |
| 31     | 637125     | -5.05        | Moderately soluble | -6.26       | Poorly soluble     | -4.02              | Moderately soluble |
| 32     | 637105     | -7.77        | Poorly soluble     | -9.64       | Poorly soluble     | -8.15              | Poorly soluble     |
| 33     | 444539     | -2.37        | Soluble            | -2.54       | Soluble            | -1.84              | Soluble            |
| 34     | 336327     | -3.64        | Soluble            | -3.43       | Soluble            | -4.31              | Moderately soluble |
| 35     | 259846     | -8.64        | Poorly soluble     | -10.22      | Insoluble          | -6.74              | Poorly soluble     |
| 36     | 238782     | -3.64        | Soluble            | -3.94       | Soluble            | -4                 | Soluble            |
| 37     | 92503      | -3.69        | Soluble            | -3.84       | Soluble            | -4.23              | Moderately soluble |
| 38     | 72307      | -3.93        | Soluble            | -3.5        | Soluble            | -4.6               | Moderately soluble |
| 39     | 6549       | -2.4         | Soluble            | -3.06       | Soluble            | -1.84              | Soluble            |
| 40     | 370        | -1.64        | Very soluble       | -2.34       | Soluble            | -0.04              | Soluble            |

ESOL=Estimated Solubility, Log S (Ali) and Log S (SILICOS-IT)= solubility methods developed by Ali and SILICOS-IT, Reference values: insoluble <-10 <poorly <-6 <moderately <-4 <soluble <-2 <very <0 <highly

<https://doi.org/10.1371/journal.pone.0324678.t003>

**Table 4. The predicted intestinal absorption, brain permeation and interaction of propolis compounds with cytochromes P450 isoforms<sup>1</sup>.**

| S. No. | Pub-Chem ID | GI absorption | BBB permeability | P-gp substrate | CYP1A2 inhibitor | CYP2C19 inhibitor | CYP2C9 inhibitor | CYP2D6 inhibitor | CYP3A4 inhibitor | Log $K_p$ (skin permeation) cm/s |
|--------|-------------|---------------|------------------|----------------|------------------|-------------------|------------------|------------------|------------------|----------------------------------|
| 1      | 44257510    | high          | yes              | yes            | yes              | no                | No               | yes              | yes              | -5.87                            |
| 2      | 21721815    | high          | yes              | no             | yes              | yes               | Yes              | yes              | yes              | -4.94                            |
| 3      | 11455669    | low           | no               | yes            | no               | no                | No               | no               | yes              | -6.53                            |
| 4      | 11272353    | low           | no               | yes            | no               | no                | No               | no               | yes              | -4.7                             |
| 5      | 11114020    | low           | no               | yes            | no               | no                | No               | no               | yes              | -4.66                            |
| 6      | 10907594    | low           | no               | yes            | no               | no                | No               | no               | yes              | -3.59                            |
| 7      | 10791588    | low           | no               | yes            | no               | no                | No               | no               | yes              | -3.91                            |
| 8      | 9984117     | low           | no               | yes            | no               | no                | No               | no               | yes              | -4.7                             |
| 9      | 5472440     | high          | yes              | no             | no               | yes               | Yes              | no               | no               | -4.32                            |
| 10     | 5471610     | low           | no               | yes            | no               | no                | No               | no               | yes              | -2.89                            |
| 11     | 5377945     | high          | no               | no             | yes              | no                | No               | yes              | yes              | -6.9                             |
| 12     | 5352032     | high          | no               | no             | yes              | no                | Yes              | yes              | yes              | -6.31                            |
| 13     | 5318691     | high          | no               | no             | yes              | no                | No               | yes              | yes              | -6.2                             |
| 14     | 5281954     | high          | yes              | no             | yes              | yes               | Yes              | yes              | yes              | -5.2                             |
| 15     | 5281787     | high          | yes              | no             | yes              | no                | Yes              | no               | no               | -5.09                            |
| 16     | 5281666     | high          | no               | no             | yes              | no                | No               | yes              | yes              | -6.56                            |
| 17     | 5281628     | high          | no               | no             | yes              | no                | No               | yes              | yes              | -6.01                            |
| 18     | 5281616     | high          | no               | no             | yes              | no                | No               | yes              | yes              | -6.35                            |
| 19     | 5280681     | high          | no               | no             | yes              | no                | No               | yes              | yes              | -6.31                            |
| 20     | 5280445     | high          | no               | no             | yes              | no                | No               | yes              | yes              | -6.25                            |
| 21     | 5280442     | high          | no               | no             | yes              | no                | Yes              | yes              | yes              | -5.66                            |
| 22     | 5280373     | high          | no               | no             | yes              | no                | No               | yes              | yes              | -5.91                            |
| 23     | 5280343     | high          | no               | no             | yes              | no                | No               | yes              | yes              | -7.05                            |
| 24     | 3938139     | high          | yes              | no             | yes              | no                | Yes              | no               | yes              | -5.35                            |
| 25     | 3873459     | high          | yes              | no             | yes              | yes               | No               | no               | no               | -5.66                            |
| 26     | 689043      | high          | no               | no             | no               | no                | No               | no               | no               | -6.58                            |
| 27     | 638278      | high          | yes              | no             | yes              | no                | Yes              | no               | yes              | -5.61                            |
| 28     | 637542      | high          | yes              | no             | no               | no                | No               | no               | no               | -6.26                            |
| 29     | 637541      | high          | yes              | no             | no               | no                | No               | no               | no               | -6.03                            |
| 30     | 637540      | high          | yes              | no             | no               | no                | No               | no               | no               | -5.86                            |
| 31     | 637125      | high          | yes              | no             | no               | yes               | Yes              | no               | yes              | -4.09                            |
| 32     | 637105      | low           | no               | yes            | no               | no                | No               | no               | yes              | -3.49                            |
| 33     | 444539      | high          | yes              | no             | no               | no                | No               | no               | no               | -5.69                            |
| 34     | 336327      | high          | yes              | yes            | yes              | yes               | No               | yes              | yes              | -5.98                            |
| 35     | 259846      | low           | no               | no             | no               | no                | No               | no               | no               | -1.9                             |
| 36     | 238782      | high          | yes              | no             | yes              | yes               | No               | no               | no               | -5.82                            |
| 37     | 92503       | high          | yes              | yes            | no               | no                | No               | yes              | yes              | -5.87                            |
| 38     | 72307       | high          | yes              | no             | no               | yes               | No               | yes              | yes              | -6.56                            |
| 39     | 6549        | high          | yes              | no             | no               | no                | No               | no               | no               | -5.13                            |
| 40     | 370         | high          | no               | no             | no               | no                | No               | no               | yes              | -6.84                            |

P-gp = P-glycoprotein, logKp skin permeation, GI = gastrointestinal, BBB = blood brain barrier

<https://doi.org/10.1371/journal.pone.0324678.t004>

**Table 5. Comparison of drug-likeness of propolis compounds predicted using different methods.**

| S. No. | Pub-Chem ID | Lipinski rule                | Ghose rule                                             | Veber rule | Egan rule                   | Muegge rule                               | Bioavailability Score |
|--------|-------------|------------------------------|--------------------------------------------------------|------------|-----------------------------|-------------------------------------------|-----------------------|
| 1      | 44257510    | Yes                          | Yes                                                    | Yes        | Yes                         | Yes                                       | 0.55                  |
| 2      | 21721815    | Yes                          | Yes                                                    | Yes        | Yes                         | Yes                                       | 0.55                  |
| 3      | 11455669    | Yes; 1 violation: MW>500     | Yes; 1 violation: MW>500                               | Yes        | Yes                         | Yes                                       | 0.56                  |
| 4      | 11272353    | Yes; 1 violation: MW>500     | No; 4 violations: MW>480, WLOGP>5.6, MR>130, #atoms>70 | Yes        | No; 1 violation: WLOGP>5.8  | No; 1 violation: XLOGP3>5                 | 0.56                  |
| 5      | 11114020    | Yes; 1 violation: MW>500     | No; 4 violations: MW>480, WLOGP>5.6, MR>130, #atoms>70 | Yes        | No; 1 violation: WLOGP>5.88 | No; 1 violation: XLOGP3>5                 | 0.56                  |
| 6      | 10907594    | Yes; 1 violation: MW>500     | No; 4 violations: MW>480, WLOGP>5.6, MR>130, #atoms>70 | Yes        | No; 1 violation: WLOGP>5.88 | No; 1 violation: XLOGP3>5                 | 0.56                  |
| 7      | 10791588    | Yes; 1 violation: MW>500     | No; 4 violations: MW>480, WLOGP>5.6, MR>130, #atoms>70 | Yes        | No; 1 violation: WLOGP>5.88 | No; 1 violation: XLOGP3>5                 | 0.85                  |
| 8      | 9984117     | Yes; 1 violation: MW>500     | No; 4 violations: MW>480, WLOGP>5.6, MR>130, #atoms>70 | Yes        | No; 1 violation: WLOGP>5.88 | No; 1 violation: XLOGP3>5                 | 0.56                  |
| 9      | 5472440     | Yes; 0 violation             | Yes                                                    | Yes        | Yes                         | No; 1 violation: XLOGP3>5                 | 0.85                  |
| 10     | 5471610     | Yes; 1 violation: MW>500     | No; 4 violations: MW>480, WLOGP>5.6, MR>130, #atoms>70 | Yes        | No; 1 violation: WLOGP>5.88 | No; 1 violation: XLOGP3>5                 | 0.85                  |
| 11     | 5377945     | Yes                          | Yes                                                    | Yes        | Yes                         | Yes                                       | 0.55                  |
| 12     | 5352032     | Yes                          | Yes                                                    | Yes        | Yes                         | Yes                                       | 0.55                  |
| 13     | 5318691     | Yes                          | Yes                                                    | Yes        | Yes                         | Yes                                       | 0.55                  |
| 14     | 5281954     | Yes                          | Yes                                                    | Yes        | Yes                         | Yes                                       | 0.55                  |
| 15     | 5281787     | Yes                          | Yes                                                    | Yes        | Yes                         | Yes                                       | 0.55                  |
| 16     | 5281666     | Yes                          | Yes                                                    | Yes        | Yes                         | Yes                                       | 0.55                  |
| 17     | 5281628     | Yes                          | Yes                                                    | Yes        | Yes                         | Yes                                       | 0.55                  |
| 18     | 5281616     | Yes                          | Yes                                                    | Yes        | Yes                         | Yes                                       | 0.55                  |
| 19     | 5280681     | Yes                          | Yes                                                    | Yes        | Yes                         | Yes                                       | 0.55                  |
| 20     | 5280445     | Yes                          | Yes                                                    | Yes        | Yes                         | Yes                                       | 0.55                  |
| 21     | 5280442     | Yes                          | Yes                                                    | Yes        | Yes                         | Yes                                       | 0.55                  |
| 22     | 5280373     | Yes                          | Yes                                                    | Yes        | Yes                         | Yes                                       | 0.55                  |
| 23     | 5280343     | Yes                          | Yes                                                    | Yes        | Yes                         | Yes                                       | 0.55                  |
| 24     | 3938139     | Yes                          | Yes                                                    | Yes        | Yes                         | Yes                                       | 0.55                  |
| 25     | 3873459     | Yes                          | Yes                                                    | Yes        | Yes                         | Yes                                       | 0.55                  |
| 26     | 689043      | Yes                          | Yes                                                    | Yes        | Yes                         | No; 1 violation: MW<200                   | 0.56                  |
| 27     | 638278      | Yes                          | Yes                                                    | Yes        | Yes                         | Yes                                       | 0.55                  |
| 28     | 637542      | Yes                          | Yes                                                    | Yes        | Yes                         | No; 1 violation: MW<200                   | 0.85                  |
| 29     | 637541      | Yes                          | Yes                                                    | Yes        | Yes                         | No; 1 violation: MW<200                   | 0.85                  |
| 30     | 637540      | Yes                          | Yes                                                    | Yes        | Yes                         | No; 1 violation: MW<200                   | 0.85                  |
| 31     | 637125      | No; 1 violation: XLOGP3>5    | Yes                                                    | Yes        | Yes                         | No; 1 violation: XLOGP3>5                 | 0.85                  |
| 32     | 637105      | Yes; 1 violation: MW>500     | No; 4 violations: MW>480, WLOGP>5.6, MR>130, #atoms>70 | Yes        | No; 1 violation: WLOGP>5.88 | No; 1 violation: XLOGP3>5                 | 0.85                  |
| 33     | 444539      | Yes                          | No; 2 violations: MW<160, #atoms<20                    | Yes        | Yes                         | No; 1 violation: MW<200                   | 0.85                  |
| 34     | 336327      | Yes                          | Yes                                                    | Yes        | Yes                         | Yes                                       | 0.55                  |
| 35     | 259846      | Yes; 1 violation: MLOGP>4.15 | No; 3 violations: WLOGP>5.6, MR>130, #atoms>70         | Yes        | No; 1 violation: WLOGP>5.88 | No; 2 violations: XLOGP3>5, Heteroatoms<2 | 0.55                  |
| 36     | 238782      | Yes                          | Yes                                                    | Yes        | Yes                         | Yes                                       | 0.55                  |

(Continued)



**Table 5.** (Continued)

| S. No. | Pub-Chem ID | Lipinski rule    | Ghose rule                             | Veber rule | Egan rule | Muegge rule                                 | Bioavailability Score |
|--------|-------------|------------------|----------------------------------------|------------|-----------|---------------------------------------------|-----------------------|
| 37     | 92503       | Yes              | Yes                                    | Yes        | Yes       | Yes                                         | 0.55                  |
| 38     | 72307       | Yes              | Yes                                    | Yes        | Yes       | Yes                                         | 0.55                  |
| 39     | 6549        | Yes; 0 violation | No; 1 violation: MW < 160              | Yes        | Yes       | No; 2 violations: MW < 200, Heteroatoms < 2 | 0.55                  |
| 40     | 370         | Yes; 0 violation | No; 2 violations: MR < 40, #atoms < 20 | Yes        | Yes       | No; 1 violation: MW < 200                   | 0.56                  |

Bioavailability score (compounds satisfying RO5 with a BS of 0.55 are considered to have excellent oral absorbance).

<https://doi.org/10.1371/journal.pone.0324678.t005>

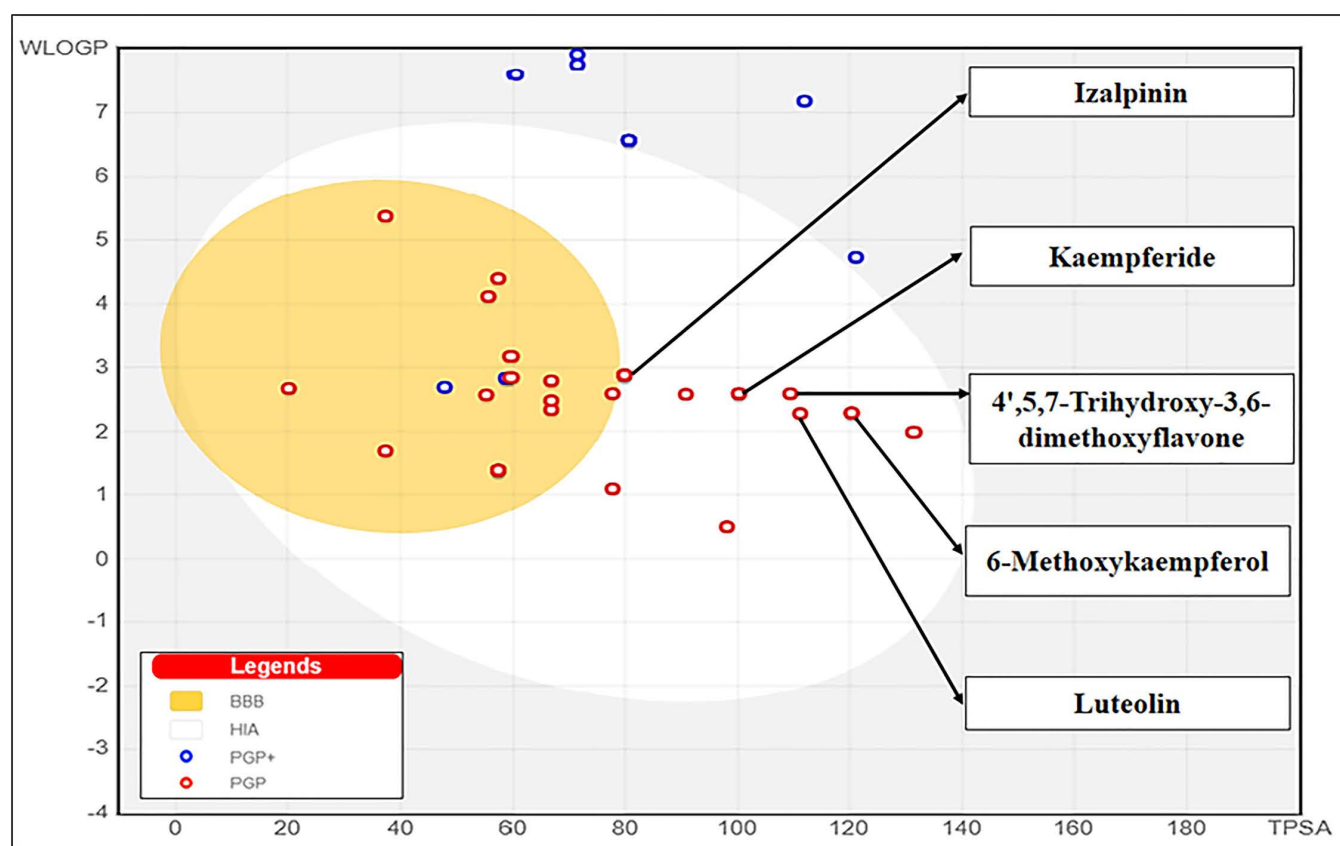

**Fig 2. BOILED-Egg plot representing the intestinal absorption and brain penetration potential of propolis-derived compounds.** The white region indicates compounds predicted to be well absorbed in the intestine, while the yellow region signifies those likely to cross the blood-brain barrier. Compounds in the gray region are predicted to have poor intestinal absorption and limited brain penetration. Red and blue dots represent P-gp-negative and P-gp-positive compounds, respectively.

<https://doi.org/10.1371/journal.pone.0324678.g002>

The ligand interactions, binding cavities, AutoDock Vina affinity scores, H-bond are summarized in [Table 6](#). The molecular docking results showed significant interactions between the KIFC1 protein and the compounds Luteolin, Kaempferide, Izalpinin, 4',5,7-Trihydroxy-3,6-dimethoxyflavone, and 6-Methoxykaempferol. Notably, Luteolin exhibited the highest binding affinity with cavity C4 (−7.7 kcal/mol) and interacted with ARG470, ALA474, and LYS479, forming H-bonds with GLY480,

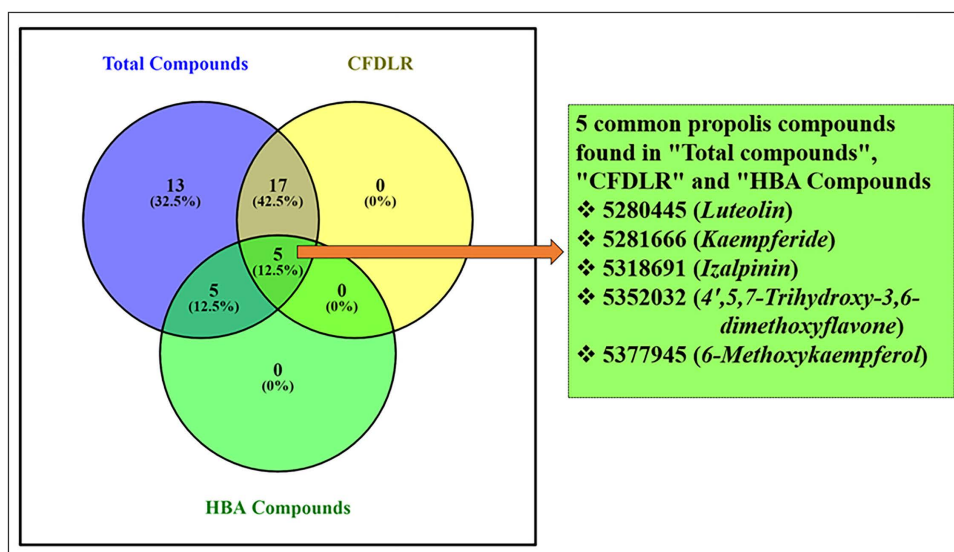

**Fig 3.** Venn diagram illustrating the overlap between propolis-derived compounds that comply with the criteria for drug-likeness rules (CFDLR) and those exhibiting strong binding energies (HBA) towards the KIFC1 protein.

<https://doi.org/10.1371/journal.pone.0324678.g003>

GLY482, and ASN523. Similarly, Izalpinin showed strong binding affinity with cavity C4 (−7.2 kcal/mol) and interacted with GLU484, CYS485, VAL469, and ARG470, forming H-bond with CYS485 (Table 6). Both compounds interacted with ARG470 in cavity C4 showing the highest affinities. However, H-bonds in Luteolin were more prevalent compared to Izalpinin in the respective cavities. However, the docking data of 4',5,7-Trihydroxy-3,6-dimethoxyflavone, and 6-Methoxykaempferol exhibited their strongest binding toward the ADP-binding site of KIFC1 and formed H-bond with THR417.

### Residue-specific grid-box docking of KIFC1 protein with top-ranked propolis-derived compounds

The 2D protein-ligand plot analysis identified key consensus-binding residues (LEU321, ARG470, ALA474, LYS479, CYS485, and ALA527) present across all five top-ranked propolis-derived compound-based potential druggable cavity identification and their residue-specific interactions with the KIFC protein 3D model. The residue-specific grid-box docking method was employed to analyze the molecular interactions and binding affinities of the key consensus-binding residues within the KIFC1 binding site. A 3D affinity grid box was set with dimensions of 12.34 Å (X), −6.197 Å (Y), and −19.742 Å (Z) to ensure optimal coverage of the identified consensus-binding residues.

All five compounds exhibited  $\Delta G_{\text{bind}}$  between −7.35 and −6.14 kcal/mol (Table 7). Figs 4–6 showed the docking poses (3D and 2D ligand interaction plots) of the inhibitors within the KIFC1 consensus-binding sites, including key residues involved in propolis inhibitor binding. 3D and 2D interaction plots help in the evaluation of binding interaction, depicting the prominent binding modes as well as the different types of molecular bonding and interactions with particular ligands (Fig 4–6). The compound Kaempferide had the lowest  $K_i$  value of 4.12  $\mu\text{M}$ , indicating it is the most potent inhibitor among the listed compounds and suggests that it binds most effectively to KIFC1 and inhibits its activity at the lowest concentration followed by Luteolin. Both compounds interacted similarly in terms of electrostatic and torsional energies; however, the stronger van der Waals and molecular mechanics energies of Kaempferide contributed to its significant binding and inhibition efficiency. The compound 4',5,7-Trihydroxy-3,6-dimethoxyflavone had the highest  $K_i$  value of 31.72  $\mu\text{M}$ , indicating it has the less potential of inhibition compared to the rest compounds and requires a higher concentration to achieve the same level of inhibition compared to the other compounds (Table 7). Additionally, details of the scientific names along with

**Table 6. Analysis of potential druggable cavities in the KIFC1 protein and key molecular interactions with the top-ranked five propolis-derived compounds using the cavity-binding docking approach.**

| Compound                               | Cavities ID | Affinity score (kcal/mol) | Cavity volume (Å <sup>3</sup> ) | Center (x, y, z) | Docking size (x, y, z) | Ligand interactions                                                    | H-bonds                |
|----------------------------------------|-------------|---------------------------|---------------------------------|------------------|------------------------|------------------------------------------------------------------------|------------------------|
| Luteolin                               | C4          | -7.7                      | 679                             | 2, -2, -31       | 21, 21, 21             | ARG470, ALA474, LYS479, GLY480, GLY482, CYS485, ASN523, ALA527         | GLY480, GLY482, ASN523 |
|                                        | C2          | -7.4                      | 725                             | 15, -7, -20      | 21, 21, 21             | LEU321, GLY413, SER414, LYS416, THR417, PHE418                         | LYS416                 |
|                                        | C1          | -7.3                      | 957                             | -1, 11, -12      | 21, 21, 21             | GLU496, GLY629, SER631                                                 | GLU496, GLY629, SER631 |
| Kaempferide                            | C1          | -7                        | 957                             | -1, 11, -12      | 21, 21, 21             | GLU496, SER547, CYS557, GLY558, ASN626, LYS673                         | SER547, ASN626         |
|                                        | C4          | -7                        | 679                             | 2, -2, -31       | 21, 21, 21             | ALA474, ARG478, LYS479, CYS485, ASN501                                 | CYS485                 |
|                                        | C2          | -6.9                      | 725                             | 15, -7, -20      | 21, 21, 21             | ARG318, PRO319, LEU321, GLY413, GLY415, PHE418                         | GLY413, GLY415         |
| Izalpinin                              | C4          | -7.2                      | 679                             | 2, -2, -31       | 21, 21, 21             | GLU484, CYS485, VAL469, ARG470, ALA474, ALA527                         | CYS485                 |
|                                        | C2          | -7.1                      | 725                             | 15, -7, -20      | 21, 21, 21             | ARG318, PRO319, LEU321, GLY413, PHE418, GLY422, PRO424                 | GLY413                 |
|                                        | C1          | -6.9                      | 957                             | -1, 11, -12      | 21, 21, 21             | GLU496, GLN545, PRO560, ASN671                                         | GLN545, ASN671         |
| 4',5,7-Trihydroxy-3,6-dimethoxyflavone | C3          | -7                        | 685                             | 26, 3, -29       | 21, 21, 21             | GLU533, ARG537, LEU572, ARG585, THR589, ILE592, ASN593                 | ARG585, ASN593         |
|                                        | C2          | -6.9                      | 725                             | 15, -7, -20      | 21, 21, 21             | LEU321, THR417, PHE418, SER535                                         | THR417                 |
|                                        | C4          | -6.9                      | 679                             | 2, -2, -31       | 21, 21, 21             | ARG470, ASP471, ALA474, ARG478, LYS479, CYS485, ASN523, VAL526, ALA527 | ASP471, ASN523         |
| 6-Methoxykaempferol                    | C2          | -7                        | 725                             | 15, -7, -20      | 21, 21, 21             | LEU321, GLY415, THR417, PHE418                                         | THR417                 |
|                                        | C1          | -6.9                      | 957                             | -1, 11, -12      | 21, 21, 21             | GLU496, GLN545, PRO560, ASN671                                         | GLN545, ASN671         |
|                                        | C4          | -6.9                      | 679                             | 2, -2, -31       | 21, 21, 21             | ARG470, ASP471, ALA474, ARG478, LYS479, GLY480, VAL526, ALA527         | ASP471, ARG478, VAL526 |

<https://doi.org/10.1371/journal.pone.0324678.t006>

**Table 7. Residue-specific grid-box docking of KIFC1 protein with top-ranked propolis-derived compounds and estimation of inhibition constant for protein-ligand complexes.**

| Compounds                              | $\Delta G_{\text{bind}}$ (kcal/mol) | Ligand efficiency | Inhibition constant ( $\mu\text{M}$ ) | $\Delta E_{\text{vdw}}$ | $\Delta E_{\text{ele}}$ | $\Delta E_{\text{MM}}$ | $\Delta E_{\text{(un-bound)}}$ | $\Delta E_{\text{(tor-sional)}}$ | $\Delta E_{\text{(total internal)}}$ | $\Delta E_{\text{(inter-molecular)}}$ |
|----------------------------------------|-------------------------------------|-------------------|---------------------------------------|-------------------------|-------------------------|------------------------|--------------------------------|----------------------------------|--------------------------------------|---------------------------------------|
| Luteolin                               | -6.74                               | -0.32             | 11.48                                 | -7.67                   | -0.44                   | -8.11                  | -1.77                          | 1.37                             | -1.77                                | -8.11                                 |
| Kaempferide                            | -7.35                               | -0.33             | 4.12                                  | -8.27                   | -0.44                   | -8.71                  | -1.32                          | 1.37                             | -1.32                                | -8.72                                 |
| Izalpinin                              | -6.33                               | -0.3              | 22.9                                  | -7.24                   | -0.18                   | -7.46                  | -1.05                          | 1.1                              | -1.05                                | -7.43                                 |
| 4',5,7-Trihydroxy-3,6-dimethoxyflavone | -6.14                               | -0.26             | 31.72                                 | -7.56                   | -0.23                   | -7.79                  | -1.72                          | 1.65                             | -1.72                                | -7.78                                 |
| 6-Methoxykaempferol                    | -6.55                               | -0.28             | 15.81                                 | -8                      | -0.2                    | -8.2                   | -1.71                          | 1.65                             | -1.71                                | -8.2                                  |

$\Delta G_{\text{bind}}$  = Binding Affinity,  $\Delta E_{\text{vdw}}$  = van der Waals energy,  $\Delta E_{\text{ele}}$  = electrostatic energy,  $\Delta E_{\text{MM}}$  = molecular mechanics energy

<https://doi.org/10.1371/journal.pone.0324678.t007>

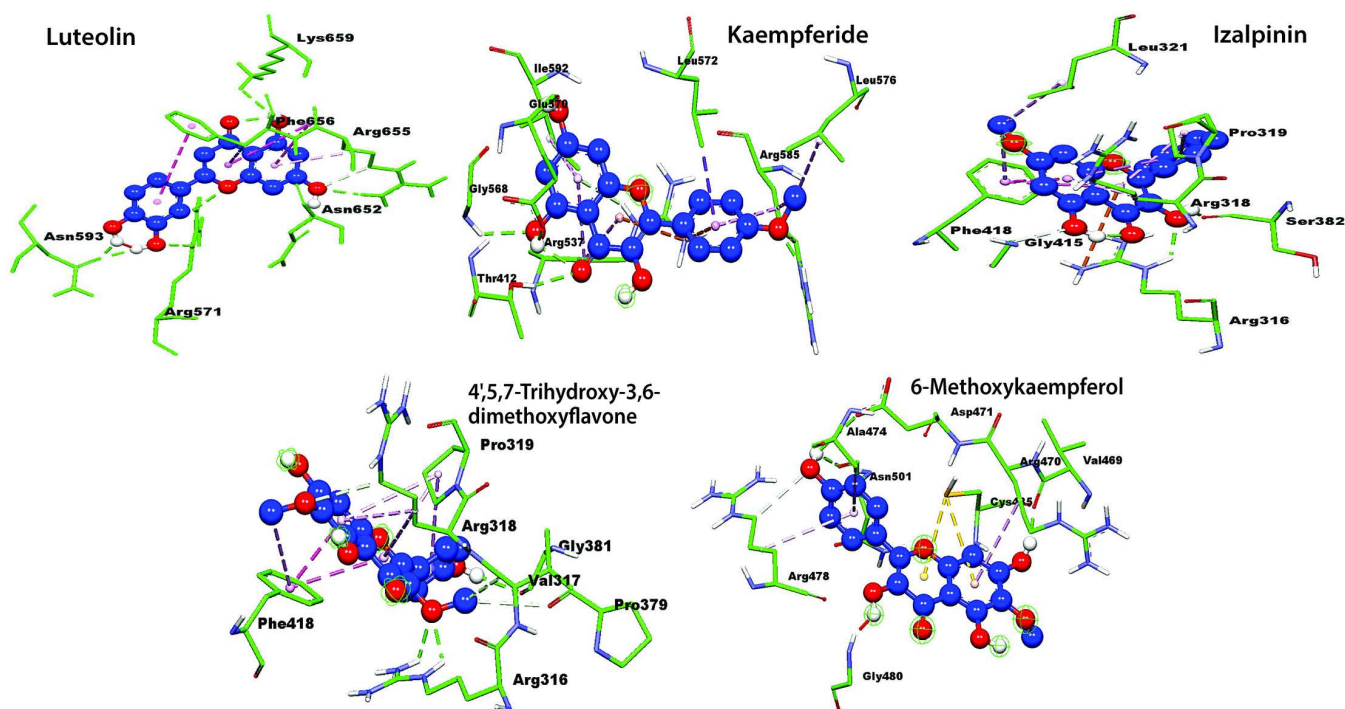

**Fig 4.** Three dimensional (3D) representations illustrating the binding interactions of the top five propolis-derived compounds with key residues of the KIFC1 protein.

<https://doi.org/10.1371/journal.pone.0324678.g004>

relevant plant or herbal sources, providing insights into the natural origins and potential therapeutic relevance of the five selected propolis-derived compounds based on their docking scores for their selection, are presented in [Table 8](#).

### Molecular dynamics simulation

Molecular dynamics (MD) simulations were conducted for 100 ns to evaluate the stability and binding interactions of KIFC1 in complex with Luteolin, Kaempferide, Izalpinin, 4',5,7-Trihydroxy-3,6-dimethoxyflavone, and 6-Methoxykaempferol. Each system consisted of approximately 58,260 atoms, including a well-hydrated environment, to ensure the system stability. The respective numbers of water molecules were 17,389 for Luteolin, 17,388 for Kaempferide, 17,386 for Izalpinin, 17,384 for 4',5,7-Trihydroxy-3,6-dimethoxyflavone, and 17,386 for 6-Methoxykaempferol. The solvation process ensured a biologically relevant environment throughout the simulations.

The average atom displacement between two superimposed molecular structures is measured quantitatively by RMSD (root mean square deviation), which is frequently used in molecular docking and structural biology to evaluate conformational differences. [Fig 7](#) shows the time-dependent changes in the root-mean-square deviation (RMSD) values for the C-alpha atoms of ligand-bound KIFC1, confirming the structural stability of the complexes. The fluctuations remained within an acceptable range of ~1.2 to 3.5 Å. In the Luteolin-bound system, the protein remained stable throughout the simulation, except for a minor fluctuation observed at 75 ns, which quickly stabilized at approximately 80 ns. The Kaempferide-KIFC1 complex exhibited RMSD values within ~1.8 to 4.2 Å, with a stable pattern emerging at 10 ns and persisting throughout the simulation. The Izalpinin-protein complex remained stable within a ~2–3.5 Å range with some minor fluctuations at 60 ns, which became stable immediately, with the ligand RMSD remaining relatively stable across the trajectory, indicating an equilibrated system. The 4',5,7-Trihydroxy-3,6-dimethoxyflavone-KIFC1 complex maintained a stable RMSD range of 2 to 3.5 Å, demonstrating that the ligand remained firmly bound to the druggable binding site. The



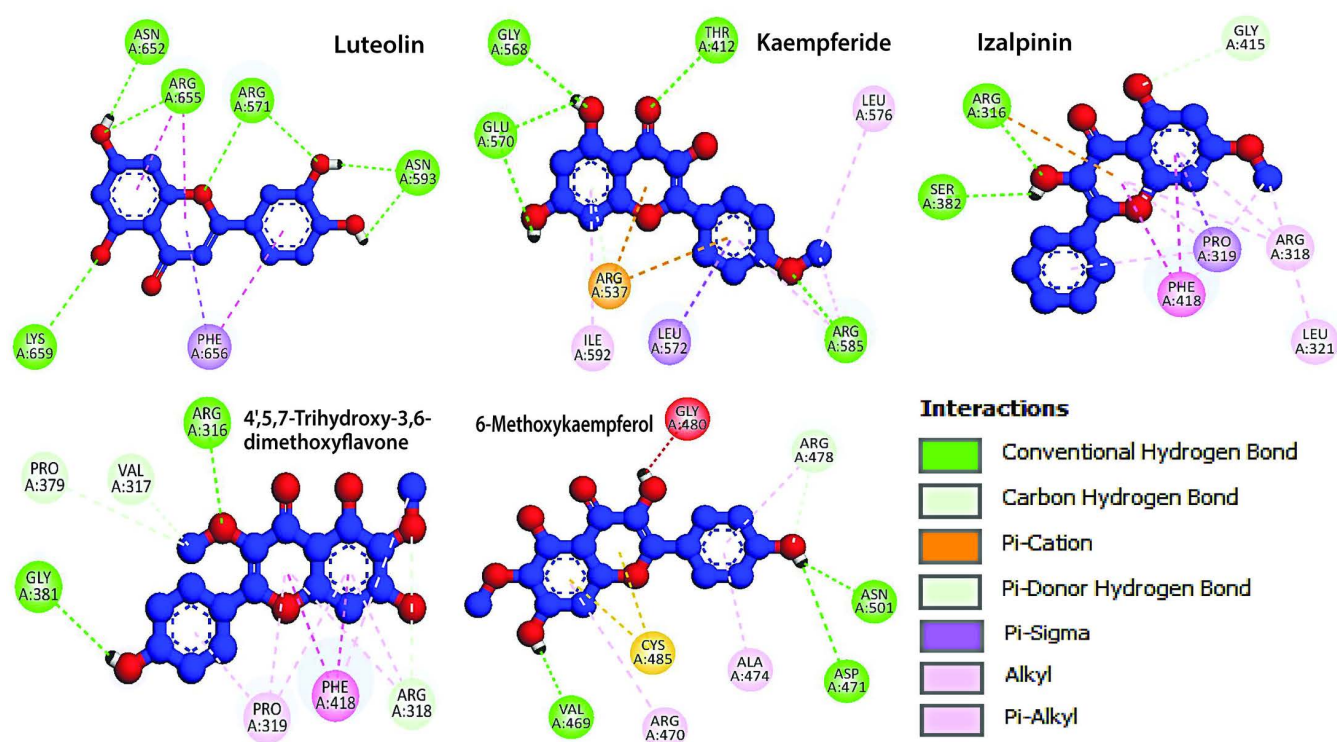

**Fig 5.** 2D interaction diagrams depicting the binding modes of the top five propolis-derived compounds with the KIFC1 protein, highlighting different types of ligands atoms interactions with key protein residues.

<https://doi.org/10.1371/journal.pone.0324678.g005>

6-Methoxykaempferol complex exhibited fluctuations within  $\sim 1.8$  to  $3.6$  Å, with a minor variation observed after 20 ns that quickly stabilized. This consistency confirms the stability of the ligand within the druggable binding site (Fig 7).

The RMSF values of the ligands were further analyzed to evaluate their stability in druggable binding modes of the protein (Fig 8). The peaks indicate the protein regions that fluctuated the most during the simulation, and the green vertical bars show ligand contacts with KIFC1 protein residues that interact with the ligands. Analysis of the RMSF MD trajectories showed high fluctuations in the loop region or the N- and C-terminal zones of the protein (Fig 8). The low RMSF values of the binding site residues indicate a stable ligand-protein complex. The RMSF plots of 4',5,7-Trihydroxy-3,6-dimethoxyflavone and 6-methoxykaempferol revealed structural stability variations with varying flexibilities at different residue indices. Luteolin, Kaempferide and Izalpinin showed significant deviations at specific residues, affecting overall stability of ligands in binding mode (Fig 8).

To assess the structural stability, the secondary structure elements (SSE) were analyzed over the simulation period (Fig 9). The SSE content remained consistent, with minor deviations: luteolin, 50.16% (29.61% helices, 20.56% strands); Kaempferide, 47.20% (27.18% helices, 20.02% strands); Izalpinin, 47.88% (28.84% helices, 19.04% strands); 4',5,7-Trihydroxy-3,6-dimethoxyflavone: 47.64% (27.76% helices, 19.88% strands), 6-Methoxykaempferol: 47.16% (28.31% helices, 18.85% strands) (Fig 9). These findings indicated that ligand binding does not induce significant structural distortions in KIFC1.

The key molecular interactions identified through MD simulations are illustrated in Fig 10, detailing the hydrogen bonds, hydrophobic contacts, and water-mediated interactions. Luteolin formed stable hydrogen bonds with SER569, GLU570, LEU572, LEU586, THR589, GLN590, GLU649, and ASN652. Hydrophobic interactions with ARG571, PRO574, LEU586, and ARG655 further reinforce ligand stability. Water-mediated hydrogen bonding significantly contributed to ligand



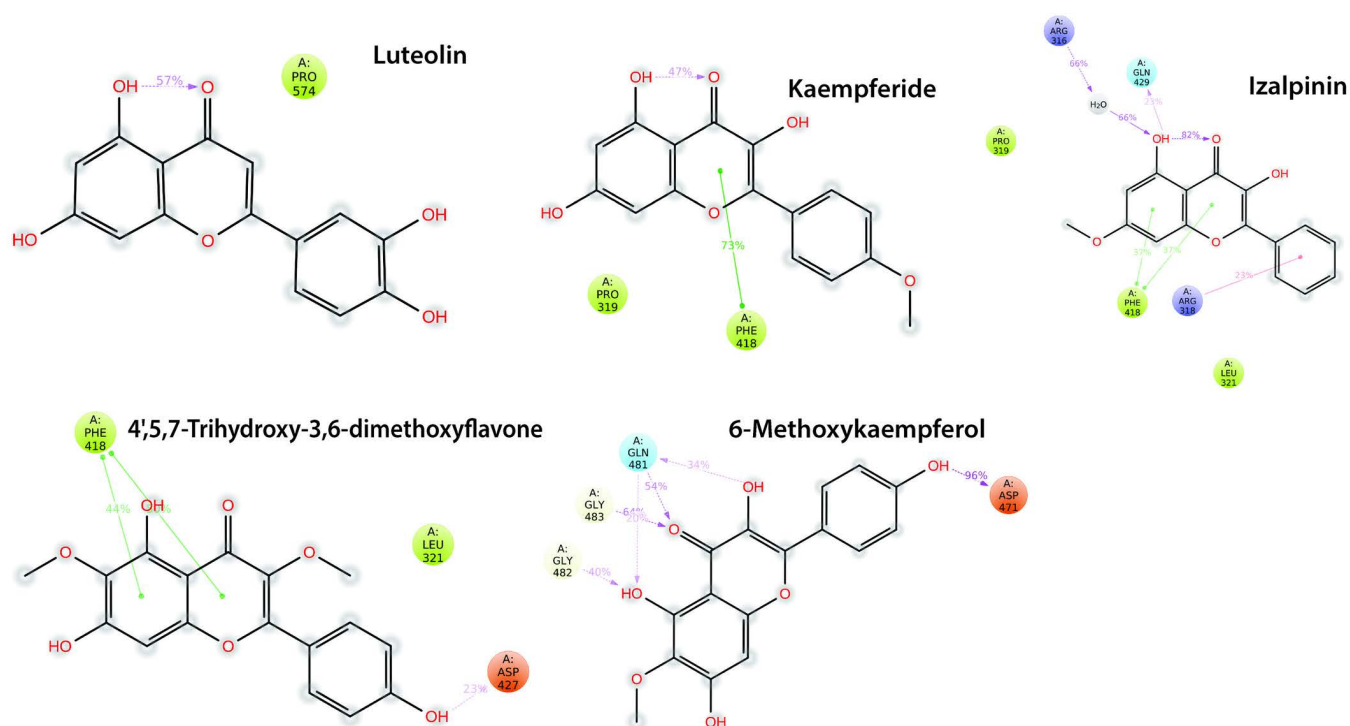

**Fig 6. 2D interaction diagrams illustrating the binding modes of the top five propolis-derived compounds with the KIFC1 protein, detailing ligand atom interactions with key protein residues.** Color scheme: red represents negatively charged residues, light blue indicates polar residues, gray denotes solvent exposure, light green highlights hydrophobic interactions, and dark green signifies Pi-Pi stacking interactions.

<https://doi.org/10.1371/journal.pone.0324678.g006>

**Table 8. Top-ranked propolis-derived compounds from molecular docking: Scientific names, natural sources, and therapeutic significance.**

| Compound Name                         | Scientific Name                                            | Compound Natural and Source                                                                                         | Potential Therapeutic Relevance                                                                                                                                                   | References |
|---------------------------------------|------------------------------------------------------------|---------------------------------------------------------------------------------------------------------------------|-----------------------------------------------------------------------------------------------------------------------------------------------------------------------------------|------------|
| Kaempferol                            | 3,5,7-trihydroxy-2-(4-hydroxyphenyl)-4H-1-benzopyran-4-one | Flavonoid – found in propolis, tea, broccoli, apples, kale, beans, tomato, strawberries, grapes and medicinal herbs | Cardio-protective, anticancer, antidiabetics, anti-inflammatory, Osteo-protective.                                                                                                | [71–73]    |
| Luteolin                              | 3',4',5,7-tetrahydroxyflavone                              | Flavonoid -Present in propolis, celery, spinach, lettuce, sweet and chili peppers                                   | Known for its anticancer, anti-inflammatory, anti-oxidant, and neuroprotective effects. It interferes with key signaling pathways involved in tumor growth and metastasis.        | [74,75]    |
| Kaempferide                           | Kaempferol 4'-O-methyl ether                               | Flavonoid - Found in propolis and various medicinal plants such as Kaempferia species                               | Demonstrates anticancer activity by targeting multiple signaling pathways involved in cancer progression. Anti-inflammatory, anti-adipogenic, antioxidant, immune modulation, etc | [76]       |
| Izalpinin                             | 3,5-Dihydroxy-7-methoxyflavone                             | Flavonoid - Found in propolis and medicinal plants such as Alpinia species                                          | Exhibits antimicrobial, anti-inflammatory, and anticancer properties.                                                                                                             | [77,78]    |
| 4',5,7-Trihydroxy-3,6-imethoxyflavone | 6-Methoxykaempferol 3-methyl ether                         | Flavonoid - Isolated from propolis and selected medicinal herbs                                                     | Potential anticancer agent with reported inhibition of cancer cell migration and proliferation. Also known for its antioxidant, antiepileptic and anticholinergic effects.        | [11,79]    |

<https://doi.org/10.1371/journal.pone.0324678.t008>

retention. Kaempferide forms hydrogen bonds with ARG316, ARG318, PRO380, SER382, PHE418, GLN429, ASN532, and GLU570. Hydrophobic contacts with ARG318, PRO319, LEU321, PHE418, and LEU430 stabilized the ligand within the pocket, while water bridges enhanced binding stability. Izalpinin-KIFC1 interactions established hydrogen bonds with ARG316, VAL317, PRO380, GLY381, SER382, and GLN429, which contributed to ligand stability. Hydrophobic

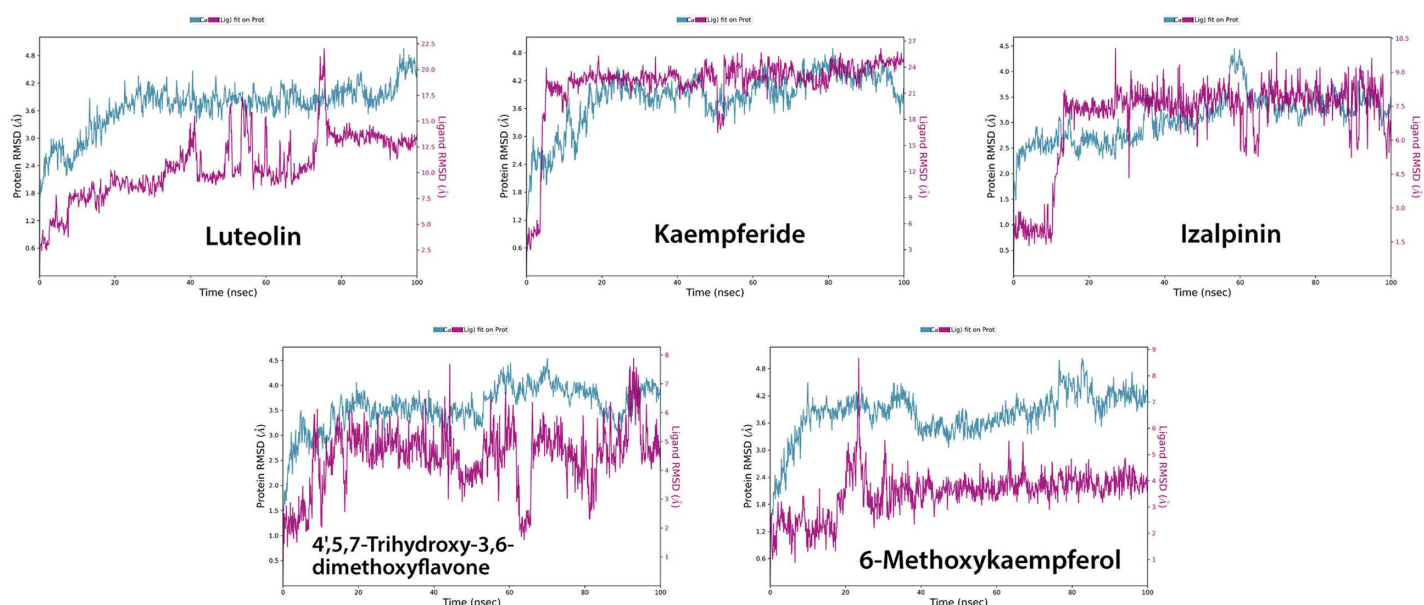

**Fig 7. Time dependent variation in the root mean square deviation (RMSD) between the C-alpha atoms (in blue) of proteins and ligands fit on proteins (red) over time of top-ranked propolis compounds with KIFC1 protein.** The protein RMSD shifts over time are plotted on the left Y axis. Differences in the ligand root-mean-square distance (RMSD) over time are plotted along the right Y-axis.

<https://doi.org/10.1371/journal.pone.0324678.g007>

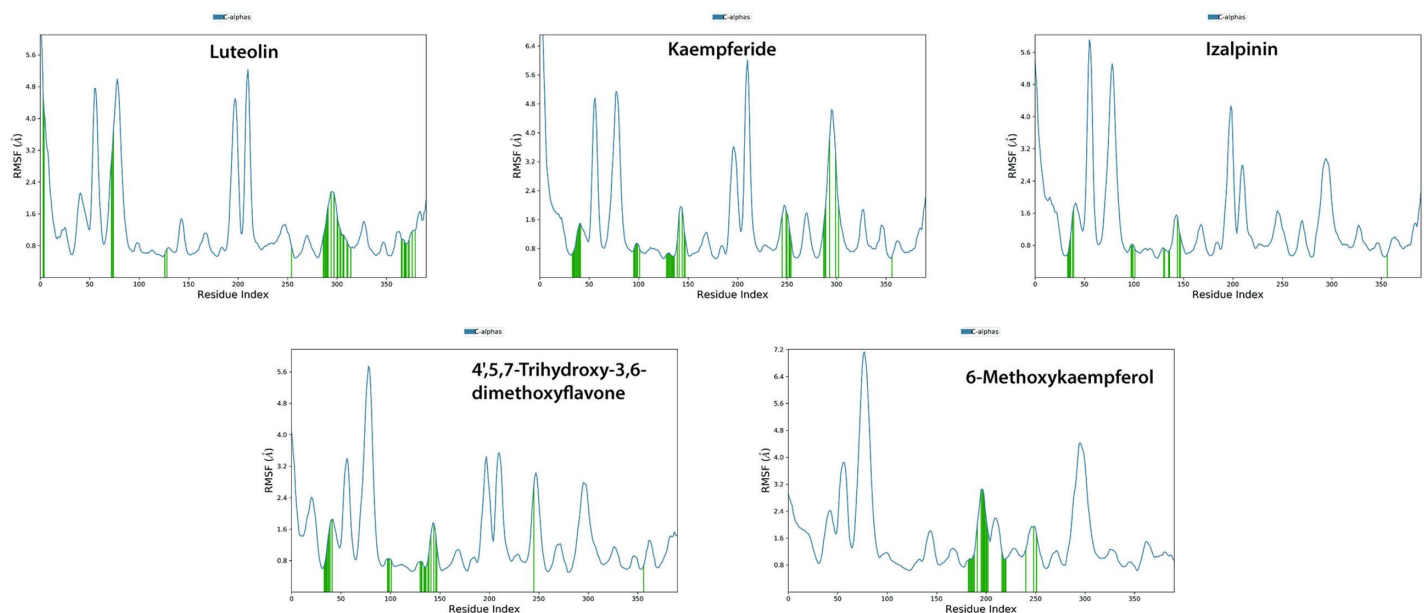

**Fig 8. The root mean square fluctuation (RMSF) plot of protein (KIFC1) and ligands (top-ranked propolis compounds) based on C alpha atoms of receptor proteins.** Protein residues that interacted with the propolis compounds are marked with green vertical bars.

<https://doi.org/10.1371/journal.pone.0324678.g008>

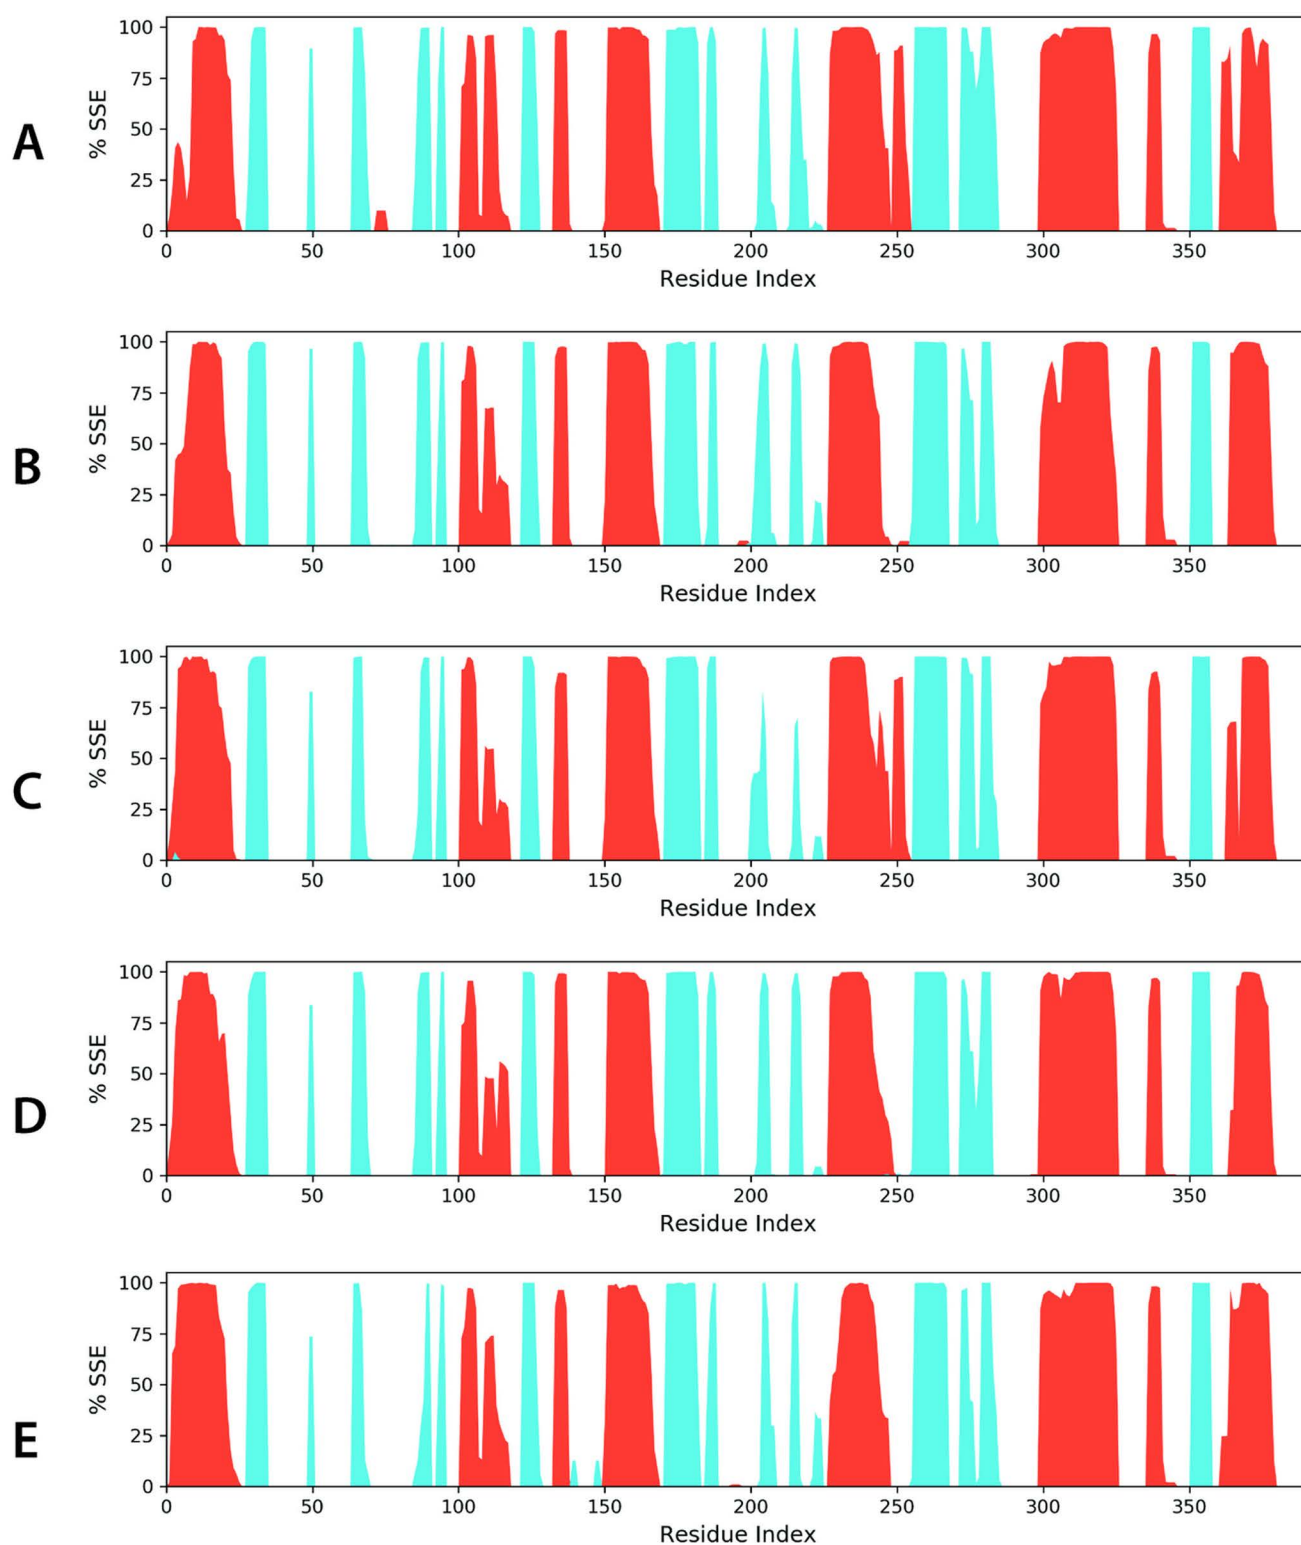

**Fig 9.** The distribution of secondary structure elements (SSE) across the protein-ligand complexes is illustrated for (A) Luteolin, (B) Kaempferide, (C) Izalpinin, (D) 4',5,7-Trihydroxy-3,6-dimethoxyflavone, and (E) 6-Methoxykaempferol, mapped against the residue index. Alpha-helices are depicted as red columns, while beta-strands are shown in blue, highlighting the structural organization within each complex.

<https://doi.org/10.1371/journal.pone.0324678.g009>

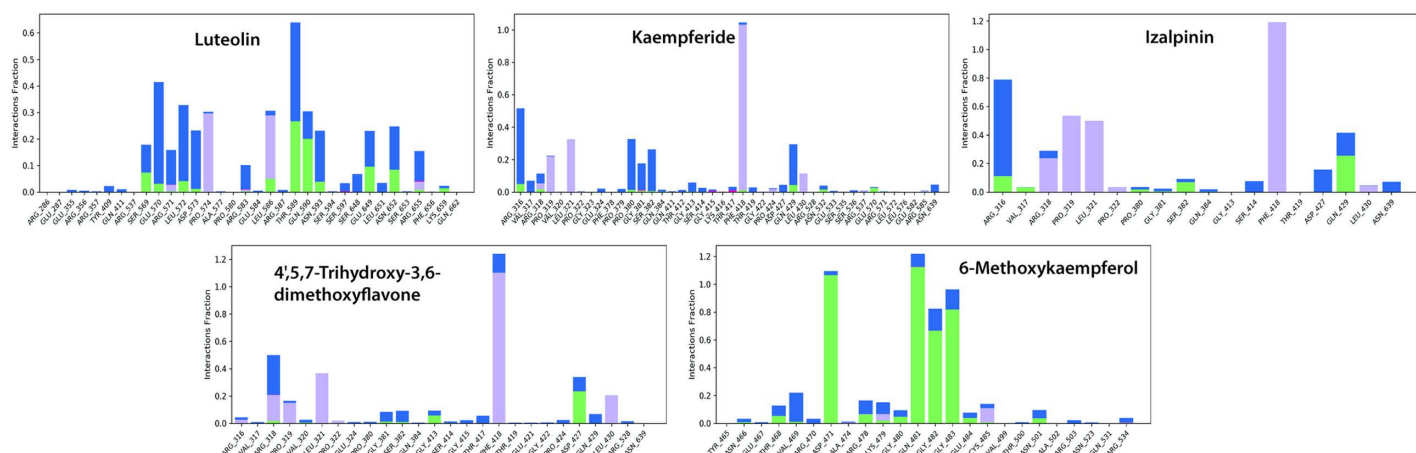

**Fig 10.** Heat-map representation of protein-ligand interactions throughout the simulation trajectory for (A) Luteolin, (B) Kaempferide, (C) Izalpinin, (D) 4',5,7-Trihydroxy-3,6-dimethoxyflavone, and (E) 6-Methoxykaempferol, mapped against the residue index.

<https://doi.org/10.1371/journal.pone.0324678.g010>

interactions with ARG318, PRO319, LEU321, PRO322, PHE418, and LEU430 provided additional support, whereas water bridges reinforced the retention of the ligand in the active site. 4',5,7-Trihydroxy-3,6-dimethoxyflavone-KIFC1 interactions formed stable hydrogen bonds with ARG318, GLY381, SER382, GLY413, PRO424, and ASP427. Hydrophobic interactions with ARG316, ARG318, PRO319, LEU321, PRO322, PHE418, and LEU430 stabilized the ligand with minimal ionic interactions observed. Water-mediated hydrogen bonding further reinforced this complex. 6-Methoxykaempferol-KIFC1 interactions exhibited hydrogen bonds with ASN466, THR468, VAL469, ASP471, ARG478, LYS479, GLY480, GLN481, GLY482, GLY483, GLU484, and ASN501, ensuring stable ligand retention. Hydrophobic interactions with LYS479 and CYS485 contributed to ligand stability, whereas water-mediated hydrogen bonds maintained strong binding (**Fig 10**).

Overall, MD simulation experiments confirmed that all five ligands established stable interactions with KIFC1, demonstrating strong binding affinity without inducing significant structural distortions. These findings provide valuable insights into the molecular mechanisms governing ligand binding, and highlight the potential of these compounds for further experimental validation.

## Principal component analysis

Principal Component Analysis (PCA) is an essential technique used in molecular dynamics (MD) simulations to analyze the collective motions of proteins. It reduces the complex motion of atoms into selective principal components (PCs) to recognize the dominant conformational changes occurring during the simulation. In this study, PCA was performed on KIFC1-ligand complexes to evaluate the structural stability, flexibility, and dynamic behavior of the system when bound to luteolin (A), kaempferide (B), Izalpinin (C), 4',5,7-Trihydroxy-3,6-dimethoxyflavone (D), and 6-Methoxykaempferol (E) (Fig 11). The collective motions of the protein were analyzed throughout the MD simulation to capture dynamic fluctuations over the trajectory. The eigenvalue plots against the eigenvector index (eigenmode) confirm the stability of the system (Fig 11). The PCA trajectories of ligands A, B, C, D, and E demonstrated distinct influences on the conformational landscape of KIFC1, highlighting the variations in structural flexibility. Fluctuations in hyperspace eigenvectors were observed within the eigenvalues, where higher eigenvalues were correlated with increased protein mobility. Eigenvector analysis indicated that dominant motions were present across all the selected complexes, with higher eigenvalues reflecting significant conformational shifts. To interpret these variations further, three principal components (PC1, PC2, and PC3) were extracted and plotted. PC3 exhibited the least variability (Fig 11), suggesting a more compact and stabilized protein-ligand complex. PC1 clusters of Kaempferide (B) compound had exhibited the highest variability (35.43%), PC2 showed



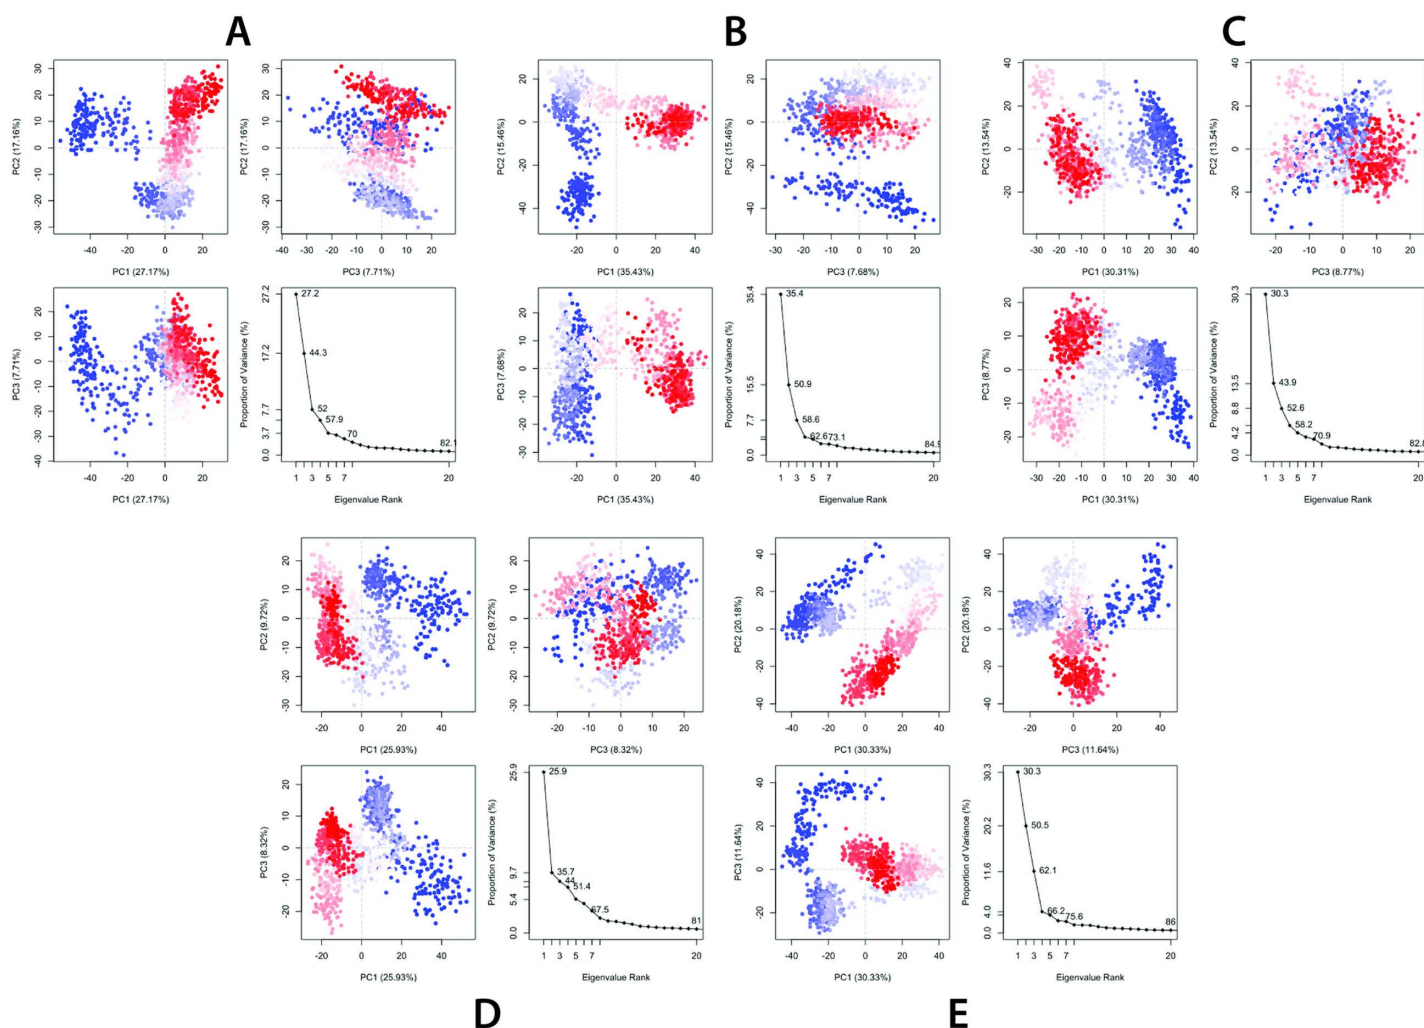

**Fig 11. Principal Component Analysis (PCA) plot illustrating the percentage of variance across different principal components (PC1, PC2, and PC3).** Three distinct sections were generated to observe variations in molecular dynamics. The analysis was performed for (A) Luteolin, (B) Kaempferide, (C) Izalpinin, (D) 4',5,7-Trihydroxy-3,6-dimethoxyflavone, and (E) 6-Methoxykaempferol.

<https://doi.org/10.1371/journal.pone.0324678.g011>

variability (15.46%), and PC3 had the lowest variability (7.68%). Overall, the reduced variability in PC3 cells supports the understanding that ligand binding reinforces structural integrity, limiting excessive motion. Additionally, the color-coded PCA plot provided a visual representation of protein flexibility: blue areas corresponded to high mobility, white areas indicated intermediate motion, and red areas represented minimal flexibility (Fig 11).

### MM-GBSA binding free energy analysis of KIFC1 with propolis-derived compounds

MM-GBSA is a widely used computational approach to estimate the binding free energies ( $\Delta G_{\text{Bind}}$ ) of protein-ligand complexes. In this case, computation with lower  $\Delta G_{\text{Bind}}$  values indicated stronger binding affinities between the ligand and the target protein. The MM-GBSA binding free energies ( $\Delta G_{\text{Bind}}$ ) of the KIFC1-ligand complexes showed significant pattern of energetic estimation like KIFC1-Luteolin, i.e.,  $-39.8675$  kcal/mol, KIFC1-Kaempferide, i.e.,  $-33.8669$  kcal/mol, KIFC1-Izalpinin, i.e.,  $-44.4599$  kcal/mol, KIFC1-4',5,7-Trihydroxy-3,6-dimethoxyflavone, i.e.,  $-42.003$  kcal/mol and KIFC1-6-Methoxykaempferol, i.e.,  $-53.0327$  kcal/mol (Table 9). Among these five compounds, 6-Methoxykaempferol



**Table 9. MM-GBSA binding free energies computations of the top-ranked docked KIFC1-ligand (propolis-derived small molecules) complexes.**

| Energies                                                      | KIFC1-Luteolin | KIFC1- Kaempferide | KIFC1- Izalpinin | KIFC1–4',5,7-Trihydroxy-3,6-dimethoxyflavone | KIFC1–6-Methoxykaempferol |
|---------------------------------------------------------------|----------------|--------------------|------------------|----------------------------------------------|---------------------------|
| <b>MM-GBSA <math>\Delta G</math> Bind (kcal/mol)</b>          | –39.8675       | –33.8669           | –44.4599         | –42.003                                      | –53.0327                  |
| <b>MM-GBSA <math>\Delta G</math> Bind Coulomb (kcal/mol)</b>  | –12.4349       | –14.6728           | –0.77943         | –17.9378                                     | –28.2251                  |
| <b>MM-GBSA <math>\Delta G</math> Bind Covalent (kcal/mol)</b> | 1.583922       | 0.439944           | –0.22495         | 1.896344                                     | 0.84432                   |
| <b>MM-GBSA <math>\Delta G</math> Bind H-bond (kcal/mol)</b>   | –0.91523       | –0.0000921         | –0.76707         | –0.38889                                     | –3.48526                  |
| <b>MM-GBSA <math>\Delta G</math> Bind Lipo (kcal/mol)</b>     | –5.07359       | –6.16688           | –10.0106         | –12.0955                                     | –7.51317                  |
| <b>MM-GBSA <math>\Delta G</math> Bind Solv GB (kcal/mol)</b>  | 10.44199       | 19.53683           | 9.145694         | 21.87094                                     | 21.01219                  |
| <b>MM-GBSA <math>\Delta G</math> Bind vdW (kcal/mol)</b>      | –27.8384       | –27.5436           | –36.2582         | –31.2444                                     | –33.2059                  |

The description of above energies are indicated as Coulomb—Coulomb energy; Covalent—Covalent binding energy; H-bond—Hydrogen-bonding; Lipo—Lipophilic energy; Solv GB—Generalized Born electrostatic solvation energy and vdW—Van der Waals energy.

<https://doi.org/10.1371/journal.pone.0324678.t009>

exhibited the strongest binding affinity (–53.0327 kcal/mol), followed by Izalpinin (–44.4599 kcal/mol), and 4',5,7-Trihydroxy-3,6-dimethoxyflavone (–42.003 kcal/mol). Luteolin (–39.8675 kcal/mol) and Kaempferide (–33.8669 kcal/mol) also showed favorable interactions but with slightly weaker binding affinities compared to the other top-ranked propolis-derived compounds (Table 9).

The MM-GBSA binding free energy is influenced by several contributing factors, including Coulombic interactions, covalent binding energy, hydrogen bonding, lipophilic interactions, solvation energy, and van der Waals (vdW) forces, which were also computed. The strongest electrostatic contribution was observed for 6-Methoxykaempferol (–28.2251 kcal/mol), followed by 4',5,7-Trihydroxy-3,6-dimethoxyflavone (–17.9378 kcal/mol). In contrast, Izalpinin (–0.77943 kcal/mol) had significantly lower Coulomb interactions, suggesting a lower contribution from electrostatic forces. The highest hydrogen bonding energy was recorded for 6-Methoxykaempferol (–3.48526 kcal/mol), followed by luteolin (–0.91523 kcal/mol), and Izalpinin (–0.76707 kcal/mol). Izalpinin (–10.0106 kcal/mol) and 4',5,7-Trihydroxy-3,6-dimethoxyflavone (–12.0955 kcal/mol) showed strong lipophilic interactions, which can enhance ligand retention in the binding pocket. Kaempferide (–6.16688 kcal/mol) had the weakest lipophilic contribution among the five ligands. Izalpinin (–36.2582 kcal/mol) exhibited the strongest vdW interactions, followed by 6-Methoxykaempferol (–33.2059 kcal/mol) (Table 9). These interactions play a crucial role in maintaining ligand stability within the KIFC1 binding pocket.

## Discussion

Kinesin family member C1 (KIFC1) is crucial for cell division and highly expressed in cancer cells. KIFC1 plays an essential role in centrosome clustering, a process that allows cancer cells to bypass multipolar divisions and maintain genomic stability. By crosslinking microtubules and facilitating bipolar spindle formation, KIFC1 prevents chromosomal missegregation, which is a key factor in tumor survival. Additionally, its interactions with mitotic regulators, such as cyclins and spindle checkpoint proteins, further underline its importance in sustaining the proliferative potential of malignant cells. Given that

normal somatic cells do not rely on KIFC1 for spindle organization, its targeted inhibition presents a promising strategy for selectively disrupting cancer cell [18,25,30–35,80]. However, drugs targeting KIFC1 inhibition remain limited. Propolis is known to inhibit cancer cell proliferation, angiogenesis, metastasis and as adjunct chemotherapeutic agent [25,80,81]. This study was designed to explore propolis-derived small molecules as KIFC1 inhibitors for cancer therapy using an *in silico* approach.

Protein homology modeling predicts a protein's three-dimensional structure using amino acid sequences and reduces the time, labor, and cost associated with traditional experimental techniques used for drug design[80]. The results of KIFC1 protein sequence alignment methods provided models with less than 60% coverage in the Protein Data Bank (PDB). Therefore, AlphaFold 3D model was preferred to achieve accurate protein structure prediction because the AlphaFold-generated models undergo rigorous energy minimization, structural assessment, and validation processes, ensuring their precision and reliability [42,44]. In the Critical Assessment of Techniques for Protein Structure Prediction (CASP14), AlphaFold was the top-ranked protein structure prediction method by a large margin, producing predictions with high accuracy established by Google DeepMind and EMBL's European Bioinformatics Institute (EMBL-EBI) [42]. Furthermore, the stereo-chemical assessment and validation for selected AlphaFold 3D model further provided a justification of KIFC1 for subsequent experiment [48]. It is established that computer aided pharmacokinetics predictions are cost-effective and save resources in the new drug design and development in contrast to experimental studies. The study used Lipinski's rule of five which is critical for rational drug design and low permeability or poor absorption of a specific molecule occurs when it violates one of Lipinski's rule of fives [82,83]. The molecular weights of the most propolis-derived compounds were less than 500 and TPSA was less than 150 predicting adequate absorption. The lipophilicity and water solubility parameters of these compounds showed a balance of lipophilicity and hydrophilicity indicating favorable ADME properties. These findings are in agreement with the studies that predicted the ADMET properties and conducted *in vivo* *in vitro* experiments for further validation of outcomes [82]. The CYP3A4 inhibitors have the potential to enhance the effectiveness of specific chemotherapy drugs by increasing their plasma concentrations and bioavailability [52,82]. The top ten conformations for each compound (ligand) based on binding affinity energy were saved and the top-5 binding poses were selected from an initial set of forty compounds. Based on drug-likeness criteria and binding affinity with the KIFC1 protein, 6-methoxy kaempferol, 4',5,7-Trihydroxy-3,6-dimethoxyflavone, Izalpinin, Kaempferide, and luteolin were identified as the best candidates. All the five compounds showed a similar bioavailability score (0.55) and inhibited the enzymes CYP1A2, CYP2D6, and CYP3A4, with 4',5,7-Trihydroxy-3,6-dimethoxyflavone also inhibiting CYP2C9, indicating their potential as drug candidates for KIFC1 inhibition. Kaempferol, Luteolin, Kaempferide, Izalpinin and 4',5,7-Trihydroxy-3, 6-dimethoxyflavone are flavonoid known to inhibit tumor growth by targeting various cellular processes such as apoptosis, angiogenesis, migration, and cell cycle progression [42,62,73,84,85].

Residue-specific grid-box based cavity binding (docking) allowed precise identification and evaluation of the interaction sites between the five propolis-derived compounds and KIFC1. This method helps predict the binding affinity and stability of drug candidates [58,86]. The molecular docking results revealed significant interactions between the KIFC1 protein and the five selected compounds. Notably, Luteolin demonstrated the highest binding affinity to cavity C4, closely followed by Izalpinin. Both Luteolin and Izalpinin displayed the highest affinity for ARG470 in cavity C4. Luteolin, in particular, formed more hydrogen bonds compared to Izalpinin in the respective cavities. These interactions with ARG470 in both compounds highlight its critical role in binding efficacy, indicating its potential as a key target for designing KIFC1 inhibitors. These results reinforce the significance of hydrogen bonding and specific residue interactions in enhancing binding affinity and stability, in agreement with previous studies [87–89]. However, the grid-box molecular interactions and binding analysis predicted Kaempferide, with a  $K_i$  of 4.12  $\mu$ M, and binding energy of -7.35 kcal/mol as the most significant inhibitor which was comparable to the most effective KIFC1 inhibitor AZ82 (binding energy of -7.26 kcal/mol) [36].

Molecular dynamics (MD) simulations are important for designing novel drugs because they provide insights into the behavior and interactions of drug molecules with target proteins or biological systems [90]. We employed this method

to analyze the five commonly interacting top-ranked docked complexes to understand the function of small molecules derived from propolis in inhibiting the KIFC1 protein, thus controlling the KIFC1 pathway to regulate cancer expression. The general stability of the protein-ligand complexes was evaluated by calculating the root-mean-square deviation (RMSD). The RMSDs for both 4',5,7-trihydroxy-3,6-dimethoxyflavone and 6-methoxy kaempferol complex with KIFC converged during the 100 ns in a range of 1.5–3.9 Å. These findings represent quality predictions based on a critical assessment of the prediction of interaction criteria, and demonstrate high stability. The observed minor time interval-associated variations in RMSD values are common in molecular dynamics simulations and may not necessarily impact the overall stability or efficacy of the complexes [91,92].

RMSF analysis provides dynamic perspective on protein flexibility and focuses on the regions that are crucial for conformational changes and binding events, whereas the distribution of secondary structure elements (SSEs) helps to understand how ligand binding affects the overall structure and stability of proteins [93]. The RMSF analysis of two selected protein-ligand complexes in this study showed that upon binding to the 4',5,7-trihydroxy-3,6-dimethoxyflavone and 6-methoxy kaempferol, the highest molecular motion was observed in residues that were not present in the active site or substrate-binding region of KIFC1 protein. These RMSF results indicate that the propolis compounds are stabilized in the protein-binding regions. SSE analysis revealed that the structural integrity of KIFC1 was preserved by both ligands, although minute differences in the strand and helix composition may have an effect on biological activity. It was specifically observed that after simulation, PHE418 formed hydrophobic and water bridges with 4',5,7-trihydroxy-3,6-dimethoxyflavone in addition to its binding to the ADP site of KIFC1. This binding combined with the highest docking score improves the potency and physicochemical properties of the compound and fits it well into the binding pocket through Pi-Pi stacking interactions with PHE418. Therefore, this study suggests that 4',5,7-trihydroxy-3,6-dimethoxyflavone, a natural compound with drug-likeness and favorable physicochemical properties, is a promising lead for further optimization; however, further cell assays and clinical validation studies are needed.

MM-GBSA analysis provided a detailed understanding of the binding energetics of the five propolis-derived ligands with KIFC1 [70]. 6-Methoxykaempferol has emerged as the most promising inhibitor, exhibiting the strongest binding affinity (−53.0327 kcal/mol) due to its high electrostatic, hydrogen bonding, and van der Waals contributions. Izalpinin (−44.4599 kcal/mol) and 4',5,7-Trihydroxy-3,6-dimethoxyflavone (−42.003 kcal/mol) also demonstrated favorable interactions, making them strong candidates for further experimental validation. Luteolin (−39.8675 kcal/mol) and Kaempferide (−33.8669 kcal/mol) showed moderate binding affinities, suggesting potential for structural optimization to improve their interactions with KIFC1. These findings emphasize the potential of 6-Methoxykaempferol, Izalpinin, and 4',5,7-Trihydroxy-3,6-dimethoxyflavone as possible lead compounds for the synthesis of similar drug-like bio-active compounds having optimal physicochemical properties and bioavailability for targeting KIFC1 inhibition, paving the way for further refinement and *in vitro* validation of anticancer drug development.

## Conclusion

KIFC1 is crucial for centrosome clustering, prevention of chromosomal missegregation, and maintenance of genomic stability. It interacts with mitotic regulators to sustain the proliferative potential of malignant cells. Targeting KIFC1 inhibition could disrupt cancer cell division, and propolis-derived small molecules are being explored as potential inhibitors. The present computational analysis of selected propolis-derived compounds as potential KIFC1 inhibitors revealed that 4',5,7-trihydroxy-3,6-dimethoxyflavone and 6-methoxy kaempferol may be promising candidates for cancer therapy. This study attempted to provide a thorough analysis of propolis-derived compounds using computational benchmarking for KIFC1 inhibition. This may help overcome the challenges of transitioning these compounds from bench to bedside, reduce toxicity, and improve patient outcomes in cancer therapy after clinical validation.

## Supporting information

**S1 Table. Sequence alignment and protein-protein Basic Local Alignment (pBLAST) search of selected KIFC1 proteins of *Homo sapiens*.**

(XLSX)

**S2 Table. List of the compounds selected from propolis.**

(XLSX)

**S3 Table. Virtual screening through graphical-automatic drug design (iGEMDOCK) approach and post-screening analysis of propolis compounds' complexes with KIFC1.**

(XLSX)

**S1 Fig. Ramachandran plot of KIFC1 protein retrieved from AlphaFold database.**

(DOCX)

## Author contributions

**Conceptualization:** Muhammad Bilal Azmi.

**Data curation:** Muhammad Bilal Azmi, Simran Kumari, Syed Danish Haseen Ahmed.

**Formal analysis:** Muhammad Bilal Azmi, Simran Kumari, Sakina Aquil, Urooj Nizami, Arisha Sohail, Syed Danish Haseen Ahmed, Shamim Akhtar Qureshi.

**Funding acquisition:** Syed Danish Haseen Ahmed, Shamim Akhtar Qureshi.

**Investigation:** Muhammad Bilal Azmi, Simran Kumari, Sakina Aquil, Urooj Nizami, Shamim Akhtar Qureshi.

**Methodology:** Muhammad Bilal Azmi, Simran Kumari.

**Project administration:** Muhammad Bilal Azmi.

**Software:** Simran Kumari, Arisha Sohail.

**Supervision:** Muhammad Bilal Azmi, Syed Danish Haseen Ahmed.

**Validation:** Muhammad Bilal Azmi, Arisha Sohail.

**Visualization:** Sakina Aquil, Urooj Nizami.

**Writing – original draft:** Muhammad Bilal Azmi, Simran Kumari, Sakina Aquil, Urooj Nizami, Shamim Akhtar Qureshi.

**Writing – review & editing:** Muhammad Bilal Azmi, Arisha Sohail, Syed Danish Haseen Ahmed, Shamim Akhtar Qureshi.

## References

1. Pasupuleti VR, Sammugam L, Ramesh N, Gan SH. Honey, Propolis, and Royal Jelly: A Comprehensive Review of Their Biological Actions and Health Benefits. *Oxid Med Cell Longev*. 2017;2017:1259510. <https://doi.org/10.1155/2017/1259510> PMID: [28814983](#)
2. El-Sakhawy M, Salama A, Tohamy H-AS. Applications of propolis-based materials in wound healing. *Arch Dermatol Res*. 2023;316(1):61. <https://doi.org/10.1007/s00403-023-02789-x> PMID: [38151671](#)
3. Przybyłek I, Karpiński TM. Antibacterial Properties of Propolis. *Molecules*. 2019;24(11):2047. <https://doi.org/10.3390/molecules24112047> PMID: [31146392](#)
4. Rufatto LC, Luchtenberg P, Garcia C, Thomassigny C, Bouttier S, Henriques JAP, et al. Brazilian red propolis: Chemical composition and antibacterial activity determined using bioguided fractionation. *Microbiol Res*. 2018;214:74–82. <https://doi.org/10.1016/j.micres.2018.05.003> PMID: [30031483](#)
5. Ruiz-Bustos P, Alday E, Garibay-Escobar A, Sforcin JM, Lipovka Y, Hernandez J, et al. Propolis: antineoplastic activity, constituents, and mechanisms of action. *Curr Top Med Chem*. 2023;23(18):1753–64. <https://doi.org/10.2174/1568026623666230321120631> PMID: [36959133](#)
6. Watanabe MAE, Amarante MK, Conti BJ, Sforcin JM. Cytotoxic constituents of propolis inducing anticancer effects: a review. *J Pharm Pharmacol*. 2011;63(11):1378–86. <https://doi.org/10.1111/j.2042-7158.2011.01331.x> PMID: [21988419](#)

7. Wojtacka J. Propolis Contra Pharmacological Interventions in Bees. *Molecules*. 2022;27(15):4914. <https://doi.org/10.3390/molecules27154914> PMID: [35956862](https://pubmed.ncbi.nlm.nih.gov/35956862/)
8. de Groot AC. Propolis: a review of properties, applications, chemical composition, contact allergy, and other adverse effects. *Dermatitis*. 2013;24(6):263–82. <https://doi.org/10.1097/DER.0000000000000011> PMID: [24201459](https://pubmed.ncbi.nlm.nih.gov/24201459/)
9. Moskwa J, Naliwajko SK, Dobiecka D, Socha K. Bee products and colorectal cancer-active components and mechanism of action. *Nutrients*. 2023;15(7):1614. <https://doi.org/10.3390/nu15071614> PMID: [37049455](https://pubmed.ncbi.nlm.nih.gov/37049455/)
10. Hossain R, Quispe C, Khan RA, Saikat ASM, Ray P, Ongalbek D, et al. Propolis: An update on its chemistry and pharmacological applications. *Chin Med*. 2022;17(1):100. <https://doi.org/10.1186/s13020-022-00651-2> PMID: [36028892](https://pubmed.ncbi.nlm.nih.gov/36028892/)
11. Forma E, Bryś M. Anticancer activity of propolis and its compounds. *Nutrients*. 2021;13(8):2594. <https://doi.org/10.3390/nu13082594> PMID: [34444754](https://pubmed.ncbi.nlm.nih.gov/34444754/)
12. Chang H, Wang Y, Yin X, Liu X, Xuan H. Ethanol extract of propolis and its constituent caffeic acid phenethyl ester inhibit breast cancer cells proliferation in inflammatory microenvironment by inhibiting TLR4 signal pathway and inducing apoptosis and autophagy. *BMC Complement Altern Med*. 2017;17(1):471. <https://doi.org/10.1186/s12906-017-1984-9> PMID: [28950845](https://pubmed.ncbi.nlm.nih.gov/28950845/)
13. de Carvalho FM de A, Schneider JK, de Jesus CVF, de Andrade LN, Amaral RG, David JM, et al. Brazilian red propolis: extracts production, physicochemical characterization, and cytotoxicity profile for antitumor activity. *Biomolecules*. 2020;10(5):726. <https://doi.org/10.3390/biom10050726> PMID: [32384801](https://pubmed.ncbi.nlm.nih.gov/32384801/)
14. Santos DA dos, Munari FM, Frozza CO da S, Moura S, Barcellos T, Henriques JAP, et al. Brazilian red propolis extracts: study of chemical composition by ESI-MS/MS (ESI+) and cytotoxic profiles against colon cancer cell lines. *Biotechnology Research and Innovation*. 2019;3(1):120–30. <https://doi.org/10.1016/j.biori.2019.02.001>
15. Sung H, Ferlay J, Siegel RL, Laversanne M, Soerjomataram I, Jemal A, et al. Global cancer statistics 2020: GLOBOCAN estimates of incidence and mortality worldwide for 36 cancers in 185 countries. *CA Cancer J Clin*. 2021;71(3):209–49. <https://doi.org/10.3322/caac.21660> PMID: [33538338](https://pubmed.ncbi.nlm.nih.gov/33538338/)
16. Chandrasekaran G, Tátrai P, Gergely F. Hitting the brakes: targeting microtubule motors in cancer. *Br J Cancer*. 2015;113(5):693–8. <https://doi.org/10.1038/bjc.2015.264> PMID: [26180922](https://pubmed.ncbi.nlm.nih.gov/26180922/)
17. Xiao K-H, Teng K, Ye Y-L, Tan L, Chen M-K, Liang H-T, et al. Kinesin family member C1 accelerates bladder cancer cell proliferation and induces epithelial-mesenchymal transition via Akt/GSK3 $\beta$  signaling. *Cancer Sci*. 2019;110(9):2822–33. <https://doi.org/10.1111/cas.14126> PMID: [31278883](https://pubmed.ncbi.nlm.nih.gov/31278883/)
18. Kostecka LG, Olseen A, Kang K, Torga G, Pienta KJ, Amend SR. High KIFC1 expression is associated with poor prognosis in prostate cancer. *Med Oncol*. 2021;38(5):47. <https://doi.org/10.1007/s12032-021-01494-x> PMID: [33760984](https://pubmed.ncbi.nlm.nih.gov/33760984/)
19. Liu Y, Zhan P, Zhou Z, Xing Z, Zhu S, Ma C, et al. The overexpression of KIFC1 was associated with the proliferation and prognosis of non-small cell lung cancer. *J Thorac Dis*. 2016;8(10):2911–23. <https://doi.org/10.21037/jtd.2016.10.67> PMID: [27867568](https://pubmed.ncbi.nlm.nih.gov/27867568/)
20. Mittal K, Choi DH, Klimov S, Pawar S, Kaur R, Mitra AK, et al. A centrosome clustering protein, KIFC1, predicts aggressive disease course in serous ovarian adenocarcinomas. *J Ovarian Res*. 2016;9:17. <https://doi.org/10.1186/s13048-016-0224-0> PMID: [26992853](https://pubmed.ncbi.nlm.nih.gov/26992853/)
21. Ogden A, Garlapati C, Li XB, Turaga RC, Oprea-Ilie G, Wright N, et al. Multi-institutional study of nuclear KIFC1 as a biomarker of poor prognosis in African American women with triple-negative breast cancer. *Sci Rep*. 2017;7:42289. <https://doi.org/10.1038/srep42289> PMID: [28218233](https://pubmed.ncbi.nlm.nih.gov/28218233/)
22. Sekino Y, Oue N, Koike Y, Shigematsu Y, Sakamoto N, Sentani K, et al. KIFC1 inhibitor CW069 induces apoptosis and reverses resistance to docetaxel in prostate cancer. *J Clin Med*. 2019;8(2):225. <https://doi.org/10.3390/jcm8020225> PMID: [30744126](https://pubmed.ncbi.nlm.nih.gov/30744126/)
23. Xiao Y-X, Shen H-Q, She Z-Y, Sheng L, Chen Q-Q, Chu Y-L, et al. C-terminal kinesin motor KIFC1 participates in facilitating proper cell division of human seminoma. *Oncotarget*. 2017;8(37):61373–84. <https://doi.org/10.18632/oncotarget.18139> PMID: [28977870](https://pubmed.ncbi.nlm.nih.gov/28977870/)
24. Ju J-Q, Zhang H-L, Wang Y, Hu L-L, Sun S-C. Kinesin KIFC3 is essential for microtubule stability and cytokinesis in oocyte meiosis. *Cell Commun Signal*. 2024;22(1):199. <https://doi.org/10.1186/s12964-024-01589-8> PMID: [38553728](https://pubmed.ncbi.nlm.nih.gov/38553728/)
25. Xiao Y-X, Yang W-X. KIFC1: a promising chemotherapy target for cancer treatment?. *Oncotarget*. 2016;7(30):48656–70. <https://doi.org/10.18632/oncotarget.8799> PMID: [27102297](https://pubmed.ncbi.nlm.nih.gov/27102297/)
26. Wei Y-L, Yang W-X. Kinesin-14 motor protein KIFC1 participates in DNA synthesis and chromatin maintenance. *Cell Death Dis*. 2019;10(6):402. <https://doi.org/10.1038/s41419-019-1619-9> PMID: [31127080](https://pubmed.ncbi.nlm.nih.gov/31127080/)
27. Ali I, Yang W-C. The functions of kinesin and kinesin-related proteins in eukaryotes. *Cell Adh Migr*. 2020;14(1):139–52. <https://doi.org/10.1080/19336918.2020.1810939> PMID: [32842864](https://pubmed.ncbi.nlm.nih.gov/32842864/)
28. Sun M, Jia M, Ren H, Yang B, Chi W, Xin G, et al. NuMA regulates mitotic spindle assembly, structural dynamics and function via phase separation. *Nat Commun*. 2021;12(1):7157. <https://doi.org/10.1038/s41467-021-27528-6> PMID: [34887424](https://pubmed.ncbi.nlm.nih.gov/34887424/)
29. Du B, Wang J, Zheng J, Huo J, Wang P. Identification of KIFC1 as an independent prognostic marker in renal clear cell carcinoma correlates with tumor proliferation and immune infiltration. *Sci Rep*. 2023;13(1):16572. <https://doi.org/10.1038/s41598-023-43732-4> PMID: [37789080](https://pubmed.ncbi.nlm.nih.gov/37789080/)
30. Sanghvi G, Roopashree R, Kashyap A, Sabarivani A, Ray S, Bhakuni PN. KIFC1 in cancer: understanding its expression, regulation, and therapeutic potential. *Exp Cell Res*. 2025;447(1):114510. <https://doi.org/10.1016/j.yexcr.2025.114510> PMID: [40058447](https://pubmed.ncbi.nlm.nih.gov/40058447/)



31. Pannu V, Rida PCG, Ogden A, Turaga RC, Donthamsetty S, Bowen NJ, et al. HSET overexpression fuels tumor progression via centrosome clustering-independent mechanisms in breast cancer patients. *Oncotarget*. 2015;6(8):6076–91. <https://doi.org/10.18632/oncotarget.3475> PMID: [25788277](#)
32. Sharma N, Setiawan D, Hamelberg D, Narayan R, Aneja R. Computational benchmarking of putative KIFC1 inhibitors. *Med Res Rev*. 2023;43(2):293–318. <https://doi.org/10.1002/med.21926> PMID: [36104980](#)
33. She Z-Y, Yang W-X. Molecular mechanisms of kinesin-14 motors in spindle assembly and chromosome segregation. *Journal of Cell Science*. 2017;130(13):2097–110. <https://doi.org/10.1242/jcs.200261>
34. Wu J, Mikule K, Wang W, Su N, Petteruti P, Gharahdaghi F, et al. Discovery and mechanistic study of a small molecule inhibitor for motor protein KIFC1. *ACS Chem Biol*. 2013;8(10):2201–8. <https://doi.org/10.1021/cb400186w> PMID: [23895133](#)
35. Park H-W, Ma Z, Zhu H, Jiang S, Robinson RC, Endow SA. Structural basis of small molecule ATPase inhibition of a human mitotic kinesin motor protein. *Sci Rep*. 2017;7(1):15121. <https://doi.org/10.1038/s41598-017-14754-6> PMID: [29123223](#)
36. Khan MKA, Ahmad S, Rabbani G, Shahab U, Khan MS. Target-based virtual screening, computational multiscore docking and molecular dynamics simulation of small molecules as promising drug candidate affecting kinesin-like protein KIFC1. *Cell Biochem Funct*. 2022;40(5):451–72. <https://doi.org/10.1002/cbf.3707> PMID: [35758564](#)
37. The UniProt Consortium. UniProt: the universal protein knowledgebase in 2023. *Nucleic Acids Res*. 2023;51(D1):D523–31. <https://doi.org/10.1093/nar/gkac1052> PMID: [36408920](#)
38. Wang Y, Wang Q, Huang H, Huang W, Chen Y, McGarvey PB, et al. A crowdsourcing open platform for literature curation in UniProt. *PLoS Biol*. 2021;19(12):e3001464. <https://doi.org/10.1371/journal.pbio.3001464> PMID: [34871295](#)
39. Sayers EW, Beck J, Bolton EE, Bourexis D, Brister JR, Canese K, et al. Database resources of the national center for biotechnology information. *Nucleic Acids Res*. 2021;49(D1):D10–7. <https://doi.org/10.1093/nar/gkaa892> PMID: [33095870](#)
40. Stover NA, Cavalcanti ARO. Using NCBI BLAST. *CP Essential Lab Tech*. 2017;14(1). <https://doi.org/10.1002/cpet.8>
41. Burley SK, Bhikadiya C, Bi C, Bittrich S, Chen L, Crichlow GV, et al. RCSB protein data bank: powerful new tools for exploring 3D structures of biological macromolecules for basic and applied research and education in fundamental biology, biomedicine, biotechnology, bioengineering and energy sciences. *Nucleic Acids Res*. 2021;49(D1):D437–51. <https://doi.org/10.1093/nar/gkaa1038> PMID: [33211854](#)
42. Varadi M, Anyango S, Deshpande M, Nair S, Natassia C, Yordanova G, et al. AlphaFold protein structure database: massively expanding the structural coverage of protein-sequence space with high-accuracy models. *Nucleic Acids Res*. 2022;50(D1):D439–44. <https://doi.org/10.1093/nar/gkab1061> PMID: [34791371](#)
43. David A, Islam S, Tankhilevich E, Sternberg MJE. The AlphaFold database of protein structures: a biologist's guide. *J Mol Biol*. 2022;434(2):167336. <https://doi.org/10.1016/j.jmb.2021.167336> PMID: [34757056](#)
44. Jumper J, Evans R, Pritzel A, Green T, Figurnov M, Ronneberger O, et al. Highly accurate protein structure prediction with AlphaFold. *Nature*. 2021;596(7873):583–9. <https://doi.org/10.1038/s41586-021-03819-2> PMID: [34265844](#)
45. Pettersen EF, Goddard TD, Huang CC, Meng EC, Couch GS, Croll TI, et al. UCSF ChimeraX: structure visualization for researchers, educators, and developers. *Protein Sci*. 2021;30(1):70–82. <https://doi.org/10.1002/pro.3943> PMID: [32881101](#)
46. Guex N, Peitsch MC, Schwede T. Automated comparative protein structure modeling with SWISS-MODEL and Swiss-PdbViewer: a historical perspective. *Electrophoresis*. 2009;30 Suppl 1:S162–73. <https://doi.org/10.1002/elps.200900140> PMID: [19517507](#)
47. Dym O, Eisenberg D, Yeates TO. PROCHECK. 2012.
48. Ravikumar A, Ramakrishnan C, Srinivasan N. Stereochemical Assessment of ( $\phi$ , $\psi$ ) Outliers in Protein Structures Using Bond Geometry-Specific Ramachandran Steric-Maps. *Structure*. 2019;27(12):1875–1884.e2. <https://doi.org/10.1016/j.str.2019.09.009> PMID: [31607615](#)
49. Laskowski RA, Furnham N, Thornton JM. The Ramachandran plot and protein structure validation. *Biomolecular Forms and Functions: A Celebration of 50 Years of the Ramachandran Map*. World Scientific; 2013. pp. 62–75.
50. Kim S, Chen J, Cheng T, Gindulyte A, He J, He S, et al. PubChem 2019 update: improved access to chemical data. *Nucleic Acids Res*. 2019;47(D1):D1102–9. <https://doi.org/10.1093/nar/gky1033> PMID: [30371825](#)
51. Gao Y-D, Huang J-F. An extension strategy of Discovery Studio 2.0 for non-bonded interaction energy automatic calculation at the residue level. *Dongwuxue Yanjiu*. 2011;32(3):262–6. <https://doi.org/10.3724/SP.J.1141.2011.03262> PMID: [21698791](#)
52. Daina A, Michielin O, Zoete V. SwissADME: a free web tool to evaluate pharmacokinetics, drug-likeness and medicinal chemistry friendliness of small molecules. *Sci Rep*. 2017;7:42717. <https://doi.org/10.1038/srep42717> PMID: [28256516](#)
53. Pires DEV, Blundell TL, Ascher DB. pkCSM: predicting small-molecule pharmacokinetic and toxicity properties using graph-based signatures. *J Med Chem*. 2015;58(9):4066–72. <https://doi.org/10.1021/acs.jmedchem.5b00104> PMID: [25860834](#)
54. Hsu K-C, Chen Y-F, Lin S-R, Yang J-M. iGEMDOCK: a graphical environment of enhancing GEMDOCK using pharmacological interactions and post-screening analysis. *BMC Bioinformatics*. 2011;12(1):S33. <https://doi.org/10.1186/1471-2105-12-S1-S33> PMID: [21342564](#)
55. Liu Y, Yang X, Gan J, Chen S, Xiao Z-X, Cao Y. CB-Dock2: improved protein-ligand blind docking by integrating cavity detection, docking and homologous template fitting. *Nucleic Acids Res*. 2022;50(W1):W159–64. <https://doi.org/10.1093/nar/gkac394> PMID: [35609983](#)
56. Liu Y, Grimm M, Dai W-T, Hou M-C, Xiao Z-X, Cao Y. CB-Dock: a web server for cavity detection-guided protein-ligand blind docking. *Acta Pharmacol Sin*. 2020;41(1):138–44. <https://doi.org/10.1038/s41401-019-0228-6> PMID: [31263275](#)

57. Yang J, Roy A, Zhang Y. Protein-ligand binding site recognition using complementary binding-specific substructure comparison and sequence profile alignment. *Bioinformatics*. 2013;29(20):2588–95. <https://doi.org/10.1093/bioinformatics/btt447> PMID: 23975762
58. Rauf MohdA, Zubair S, Azhar A. Ligand docking and binding site analysis with pymol and autodock/vina. *IJBAS*. 2015;4(2):168–77. <https://doi.org/10.14419/ijbas.v4i2.4123>
59. Eberhardt J, Santos-Martins D, Tillack AF, Forli S. AutoDock Vina 1.2.0: new docking methods, expanded force field, and python bindings. *J Chem Inf Model*. 2021;61(8):3891–8. <https://doi.org/10.1021/acs.jcim.1c00203> PMID: 34278794
60. Azmi MB, Sehgal SA, Asif U, Musani S, Abedin MFE, Suri A, et al. Genetic insights into obesity: in silico identification of pathogenic SNPs in MBOAT4 gene and their structural molecular dynamics consequences. *J Biomol Struct Dyn*. 2024;42(23):13074–90. <https://doi.org/10.1080/07391102.2023.2274970> PMID: 37921712
61. Bowers KJ, Sacerdoti FD, Salmon JK, Shan Y, Shaw DE, Chow E, et al. Molecular dynamics—Scalable algorithms for molecular dynamics simulations on commodity clusters. In: *Proceedings of the 2006 ACM/IEEE conference on Supercomputing - SC '06*. ACM Press. 2006. 84. <https://doi.org/10.1145/1188455.1188544>
62. Ferreira LG, Dos Santos RN, Oliva G, Andricopulo AD. Molecular docking and structure-based drug design strategies. *Molecules*. 2015;20(7):13384–421. <https://doi.org/10.3390/molecules200713384> PMID: 26205061
63. Ahmad S, Singh V, Gautam HK, Raza K. Multisampling-based docking reveals Imidazolidinyl urea as a multitargeted inhibitor for lung cancer: an optimisation followed multi-simulation and in-vitro study. *J Biomol Struct Dyn*. 2024;42(5):2494–511. <https://doi.org/10.1080/07391102.2023.2209673> PMID: 37154501
64. Shivakumar D, Williams J, Wu Y, Damm W, Shelley J, Sherman W. Prediction of absolute solvation free energies using molecular dynamics free energy perturbation and the OPLS force field. *J Chem Theory Comput*. 2010;6(5):1509–19. <https://doi.org/10.1021/ct900587b> PMID: 26615687
65. Malik A, Iqbal MN, Ashraf S, Khan MS, Shahzadi S, Shafique MF, et al. In silico elucidation of potential drug targets against oxygenase domain of Human eNOS Dysfunction. *PLoS One*. 2023;18(4):e0284993. <https://doi.org/10.1371/journal.pone.0284993> PMID: 37099543
66. Famuyiwa SO, Ahmad S, Fakola EG, Olusola AJ, Adesida SA, Obagunle FO, et al. Comprehensive computational studies of naturally occurring kuguacins as antidiabetic agents by targeting visfatin. *Chemistry Africa*. 2023;6(3):1415–27. <https://doi.org/10.1007/s42250-023-00604-8>
67. Palma J, Pierdominici-Sottile G. On the Uses of PCA to characterise molecular dynamics simulations of biological macromolecules: basics and tips for an effective use. *Chemphyschem*. 2023;24(2):e202200491. <https://doi.org/10.1002/cphc.202200491> PMID: 36285677
68. Kitao A. Principal component analysis and related methods for investigating the dynamics of biological macromolecules. *J*. 2022;5(2):298–317. <https://doi.org/10.3390/j5020021>
69. Grant BJ, Skjaerven L, Yao X-Q. The Bio3D packages for structural bioinformatics. *Protein Sci*. 2021;30(1):20–30. <https://doi.org/10.1002/pro.3923> PMID: 32734663
70. Wang E, Sun H, Wang J, Wang Z, Liu H, Zhang JZH, et al. End-point binding free energy calculation with MM/PBSA and MM/GBSA: strategies and applications in drug design. *Chem Rev*. 2019;119(16):9478–508. <https://doi.org/10.1021/acs.chemrev.9b00055> PMID: 31244000
71. Shahbaz M, Imran M, Momal U, Naeem H, Alsagaby SA, Al Abdulmonem W, et al. Potential effect of kaempferol against various malignancies: recent advances and perspectives. *Food and Agricultural Immunology*. 2023;34(1). <https://doi.org/10.1080/09540105.2023.2265690>
72. Rajendran P, Rengarajan T, Nandakumar N, Palaniswami R, Nishigaki Y, Nishigaki I. Kaempferol, a potential cytostatic and cure for inflammatory disorders. *Eur J Med Chem*. 2014;86:103–12. <https://doi.org/10.1016/j.ejmech.2014.08.011> PMID: 25147152
73. Nejabati HR, Roshangar L. Kaempferol: A potential agent in the prevention of colorectal cancer. *Physiol Rep*. 2022;10(20):e15488. <https://doi.org/10.14814/phy2.15488> PMID: 36259115
74. Taheri Y, Sharifi-Rad J, Antika G, Yilmaz YB, Tumer TB, Abuhamdah S, et al. Paving luteolin therapeutic potentialities and agro-food-pharma applications: emphasis on In Vivo pharmacological effects and bioavailability traits. *Oxid Med Cell Longev*. 2021;2021:1987588. <https://doi.org/10.1155/2021/1987588> PMID: 34594472
75. Çetinkaya M, Baran Y. Therapeutic Potential of Luteolin on Cancer. *Vaccines (Basel)*. 2023;11(3):554. <https://doi.org/10.3390/vaccines11030554> PMID: 36992138
76. Song B, Niu W, Zhang S, Hao M, Li Y, Chen Q, et al. A mechanistic review of the pharmacological aspects of Kaempferide as a natural compound. *Heliyon*. 2024;10(19):e38243. <https://doi.org/10.1016/j.heliyon.2024.e38243> PMID: 39397988
77. Mancipe JC, Vargas-Pinto P, Rodríguez OE, Borrego-Muñoz P, Castellanos Londoño I, Ramírez D, et al. Anti-inflammatory effect of izalpinin derived from chromolaena levisensis: λ-carrageenan-induced paw edema and In Silico model. *Molecules*. 2023;28(9):3722. <https://doi.org/10.3390/molecules28093722> PMID: 37175132
78. Guzmán-Gutiérrez SL, Nieto-Camacho A, Castillo-Arellano JI, Huerta-Salazar E, Hernández-Pasteur G, Silva-Miranda M, et al. Mexican propolis: a source of antioxidants and anti-inflammatory compounds, and isolation of a novel chalcone and ε-caprolactone derivative. *Molecules*. 2018;23(2):334. <https://doi.org/10.3390/molecules23020334> PMID: 29415430
79. Durmaz L. Antioxidant, antiepileptic, and anticholinergic properties of 4',5,7-Trihydroxy-3,6-dimethoxyflavone as natural phenolic compound: a toxicology approach. *Toxin Reviews*. 2019;40(3):292–9. <https://doi.org/10.1080/15569543.2019.1610894>
80. Li Y, Lu W, Chen D, Boohaker RJ, Zhai L, Padmalayam I, et al. KIFC1 is a novel potential therapeutic target for breast cancer. *Cancer Biol Ther*. 2015;16(9):1316–22. <https://doi.org/10.1080/15384047.2015.1070980> PMID: 26177331

81. Kocyigit A, Guler EM, Durmus E, Yenigun VB, Kanimdan E, Ozman Z, et al. Propolis enhances 5-fluorouracil mediated antitumor efficacy and reduces side effects in colorectal cancer: an in Vitro and in Vivo study. *Chem Biodivers*. 2023;20(9):e202300591. <https://doi.org/10.1002/cbdv.202300591> PMID: [37497658](#)
82. Bakchi B, Krishna AD, Sreecharan E, Ganesh VBJ, Niharika M, Maharshi S, et al. An overview on applications of SwissADME web tool in the design and development of anticancer, antitubercular and antimicrobial agents: A medicinal chemist's perspective. *Journal of Molecular Structure*. 2022;1259:132712. <https://doi.org/10.1016/j.molstruc.2022.132712>
83. Lipinski CA. Rule of five in 2015 and beyond: Target and ligand structural limitations, ligand chemistry structure and drug discovery project decisions. *Adv Drug Deliv Rev*. 2016;101:34–41. <https://doi.org/10.1016/j.addr.2016.04.029> PMID: [27154268](#)
84. Diab SE, Tayea NA, Elwakil BH, Elshewemi SS, Gad AAEM, Abdulmalek SA, et al. In vitro and in vivo anti-colorectal cancer effect of the newly synthesized sericin/propolis/fluorouracil nanopatform through modulation of PI3K/AKT/mTOR pathway. *Sci Rep*. 2024;14(1):2433. <https://doi.org/10.1038/s41598-024-52722-z> PMID: [38286826](#)
85. Hameduh T, Haddad Y, Adam V, Heger Z. Homology modeling in the time of collective and artificial intelligence. *Comput Struct Biotechnol J*. 2020;18:3494–506. <https://doi.org/10.1016/j.csbj.2020.11.007> PMID: [33304450](#)
86. Nguyen NT, Nguyen TH, Pham TNH, Huy NT, Bay MV, Pham MQ, et al. Autodock Vina Adopts More Accurate Binding Poses but Autodock4 Forms Better Binding Affinity. *J Chem Inf Model*. 2020;60(1):204–11. <https://doi.org/10.1021/acs.jcim.9b00778> PMID: [31887035](#)
87. Caron G, Ermondi G. Why we need to implement intramolecular hydrogen-bonding considerations in drug discovery. *Future Med Chem*. 2017;9(1):1–5. <https://doi.org/10.4155/fmc-2016-0195> PMID: [27957863](#)
88. Chen D, Oezguen N, Urvil P, Ferguson C, Dann SM, Savidge TC. Regulation of protein-ligand binding affinity by hydrogen bond pairing. *Sci Adv*. 2016;2(3):e1501240. <https://doi.org/10.1126/sciadv.1501240> PMID: [27051863](#)
89. J. R. Yunta M. It is important to compute intramolecular hydrogen bonding in drug design?. *AJMO*. 2017;5(1):24–57. <https://doi.org/10.12691/ajmo-5-1-3>
90. Shukla R, Tripathi T. Molecular dynamics simulation of protein and protein–ligand complexes. In: Singh DB, editor. *Computer-Aided Drug Design*. Singapore: Springer Singapore; 2020. pp. 133–161. [https://doi.org/10.1007/978-981-15-6815-2\\_7](https://doi.org/10.1007/978-981-15-6815-2_7)
91. Liu X, Shi D, Zhou S, Liu H, Liu H, Yao X. Molecular dynamics simulations and novel drug discovery. *Expert Opin Drug Discov*. 2018;13(1):23–37. <https://doi.org/10.1080/17460441.2018.1403419> PMID: [29139324](#)
92. Badar MS, Shamsi S, Ahmed J, Alam MdA. Molecular dynamics simulations: concept, methods, and applications. In: Rezaei N, editor. *Transdisciplinarity*. Cham: Springer International Publishing; 2022. pp. 131–151. [https://doi.org/10.1007/978-3-030-94651-7\\_7](https://doi.org/10.1007/978-3-030-94651-7_7)
93. Gao C, Desaphy J, Vieth M. Are induced fit protein conformational changes caused by ligand-binding predictable? A molecular dynamics investigation. *J Comput Chem*. 2017;38(15):1229–37. <https://doi.org/10.1002/jcc.24714> PMID: [28419481](#)
